# Supplementary material
Source: PubMed Central journal article supplement (PMC6396176)
Supplement: blood864025-suppl1.pdf [file blood864025-suppl1.pdf]

## SUPPLEMENTAL DATA

### SUPPLEMENTAL METHODS

#### Patient materials

We collected in this retrospective study lymphoma samples of the collaborating centers from 15 patients diagnosed with Burkitt lymphoma (BL), atypical BL/BL-like or high grade B-cell lymphoma (range 4-52 years at diagnosis) including three previously published cases<sup>1-3</sup> (refer to the attached photomicrographs of the HE stained sections of the cases in Supplemental Appendix 1). Of note is, that due to the way the cases were selected they are not population-based, and hence, we cannot exclude a recruitment bias. During routine diagnostics, those cases were shown to be IG-*MYC* negative by molecular cytogenetics applying different FISH probes including *MYC* break apart, IGH-, IGL- or IGK-*MYC* fusion probes (refer to the supplemental chapter fluorescence in situ hybridization). Based on tumor cell morphology and growth pattern, the cases were retrospectively analyzed for the occurrence of the peculiar 11q aberration by fluorescence in situ hybridization. This pattern was either the typical 11q-gain/loss or solely an 11q25-qter loss in agreement with the published case by Salaverria *et al.*<sup>2</sup>. The presence of the 11q aberration was verified using SNP-array profiling. Accordingly, the 11q aberration pattern of the cases studied herein differs from that observed in some DLBCL, which carry a gain in 11q24.3 instead of a loss (or loss of heterozygosity) as found in the cases analyzed herein<sup>4,5</sup>. The lack of an IG-*MYC* translocation and presence of 11q aberration together with the morphological and immunophenotypical findings, led to the retrospective classification as *MYC*-negative Burkitt-like lymphoma with 11q aberration (mnBLL,11q,).

The immunophenotypic characterization by immunohistochemistry of the cases was performed by the individual centers submitting the cases. Supplemental Table 1 shows an overview of the clinical, cytogenetic and immunophenotypic characteristics of the mnBLL,11q, cases studied herein.

This study was approved by local review boards and performed in line with the regulations of the Institutional Review Board of the Medical Faculty of the University Kiel (D425/03, and D447/10 and amendment from 09.03.2010).

#### Fluorescence in situ hybridization

If not obtained from previous publications or the original data from the individual centers submitting cases, FISH analyses were performed as described in the following. Extraction and labeling of BAC DNA for homemade assays, preparation of slides and hybridization on formalin fixed paraffin embedded (FFPE) tissue sections were performed as previously described<sup>6</sup>.

The locus-specific probes LSI BCL6, LSI MYC, LSI IGH/MYC and LSI BCL2 were applied (Abbott Molecular Diagnostics, Wiesbaden-Delkenheim, Germany). For the detection of IGH-MYC and IGL-MYC translocations non-commercial probes were applied<sup>7,8</sup>. Additionally, we applied a non-commercial assay to detect the peculiar pattern of chromosomal gain and loss on 11q modified from Salaverria et al.<sup>2</sup>. This assay contained the clones RP11-629A20 (11q24.3) labelled in spectrum orange, RP11-414G21 (11q23.3) labelled in spectrum green and a commercially available chromosome 11 enumeration probe labelled in spectrum aqua as control (CEP11, D11Z1 from Abbott, Wiesbaden, Germany). Evaluation of slides was performed using a Zeiss fluorescence microscope equipped with appropriate filter sets. Whenever possible for all FISH analyses at least 100 nuclei were analysed for each probe. Acquisition and processing of digital images were performed using the ISIS FISH Imaging System V5.8 (MetaSystems, Altlussheim, Germany).

### **DNA extraction**

Extraction of DNA from formalin-fixed paraffin-embedded (FFPE) tissue was performed using either the truXTRAC FFPE DNA micro Tube Kit (Covaris) or the Qiagen FFPE DNA extraction kit (Qiagen) according to manufacturers' protocols. The quality of the DNA was tested using the High Sensitivity DNA Assay on the 2100 Bioanalyzer (Agilent) to show a main peak above 200bp size. The quantity of the DNA was measured using Qubit fluorometer together with the Quant-iT dsDNA BR Assay Kit (Life Technologies).

### **OncoScan™ CNV FFPE Assay**

Copy number analysis was performed on 12 mnBLL,11q, cases using the OncoScan™ CNV FFPE Assay Kit as described<sup>9</sup>. Data were mined for copy number alterations (regions of gain, loss and copy number neutral loss of heterozygosity) using OncoScan Console 1.3 (Affymetrix) and Nexus Express for OncoScan 3 (Biodiscovery). Alterations were mapped on human reference genome build GRCh37/hg19. Only chromosomal imbalances encompassing at least 20 informative probes and being larger than 100 kb as well as CNN-LOH larger than 5 Mb were considered informative.

### **Whole exome sequencing and data processing**

#### *Sequencing*

Exome sequencing of 15 mnBLL,11q samples was performed as recently described<sup>9</sup> using the Agilent SureSelect v6 exome target enrichment kit. The library was sequenced on an Illumina HiSeq 4000 sequencing instrument (Illumina) using a paired-end 2 × 75 bp protocol.

### *Alignment and variant calling*

Alignment and variant calling have been performed as recently described<sup>9</sup>. In short, sequencing reads were mapped to human reference genome (build 37, version hs37d5) ([ftp://ftp.1000genomes.ebi.ac.uk/vol1/ftp/technical/reference/phase2\\_reference\\_assembly\\_sequence/hs37d5.fa.gz](ftp://ftp.1000genomes.ebi.ac.uk/vol1/ftp/technical/reference/phase2_reference_assembly_sequence/hs37d5.fa.gz)) with bwa-mem (version 0.7.8, minimum base quality threshold set to zero [-T 0], remaining settings left to default)<sup>10</sup>. Coordinates were sorted with bamsort (compression option set to fast<sup>11</sup> and duplicate read pairs were marked with bammarkduplicates (compression option set to best, both are part of the biobambam package (version 0.0148).

Single nucleotide variants (SNVs) and indels were called from tumor samples with the internal DKFZ pipeline based on samtools/bcftools 0.1.19 and custom filters (optimized for somatic variant calling by deactivating the pval-threshod in bcftools) and Platypus 0.8.1, respectively as described by Jabs *et al.*<sup>12</sup>. Genes were annotated with Annovar (Feb 2016). A 'confidence score' was calculated for each mutation. The maximum allowed allele frequency in ExAC<sup>13</sup> was lowered to 0.0001% (non-TCGA variants). Furthermore, variants with possibly base quality bias or a mapping quality bias (corresponding PV4 p-value < 0.01) were excluded from analysis. More cohort-based filtering criteria were applied downstream of the individual variant calling. In order to remove recurrent artifacts and misclassified germline events, somatic indels, that were identified as germline in at least two patients of the ICGC MMML-Seq whole-genome sequencing (WGS) cohort which encompasses more than 250 paired tumor-and non-tumor samples were excluded.

Finally, variants in artifact prone regions were removed. These artifact prone regions were identified in an in-house lymphoma exome cohort consisting of more than 100 whole-exome sequencing (WES) data sets from diverse lymphoma FFPE samples, which all have been applied to the same sequencing pipeline. Variants in regions with between two and four variants with maximum intermutation distance of 100 bp that were recurrently found in three or more patients were considered artifacts, unless these regions overlapped with recurrent Kataegis regions<sup>14</sup> defined by the above described in-house whole genome sequencing lymphoma cohort. Of note, despite thorough filtering, most likely some germline variants remained in the final data set. We cross-referenced the list of recurrently mutated genes in mnBLL,11q, with genes published by Lawrence *et al.*<sup>15</sup> that can be considered as large and/or late replicating genes likely constituting artifacts or passenger mutations. This refers to three genes frequently mutated in mnBLL,11q, including *TTN*, *MUC16* and *MUC5B*.

### ***GNA13* and *NFRKB* mutation verification by Sanger sequencing**

To verify the mutations in *GNA13* and *NFRKB* identified by WES primers were designed to cover the mutations. PCR primers and PCR conditions for Sanger sequencing of are listed in Supplemental Table 4. After PCR, products were subjected to Sanger sequencing using the Big Dye Terminator v1.1 Cycle Sequencing Kit (Life Technologies). Sequence analysis was performed using an ABI PRISM 3130 Genetic Analyzer.

### **Mutation modeling**

Predictions of the effects of non-synonymous coding mutations have been carried out using Mutation Assessor <sup>16</sup>, VEP <sup>17</sup> and Mechismo <sup>18</sup>. Mutation annotations on protein primary sequence has been done through the Lollipop software <sup>19</sup>. Post translational modification information has been obtained from PhosphositePlus <sup>20</sup>.

The model of full length *GNA13* alpha subunit has been obtained through Modeller <sup>21</sup> by using as multiple templates the structures of *GNA13* (PDB ID: 3AB3) and *GNAS* (PDB ID: 3SN6). The prototypical structure of *ADRB2* receptor complexed to *Gs* heterotrimer (PDB ID: 3SN6) has been used as a template to model the complex, by replacing the model of *GNA13* with the structure of *GNAS*.

## SUPPLEMENTAL RESULTS AND DISCUSSION

### *Statistics of whole exome sequencing*

Analyzing the mutational profile (single nucleotide variants and small insertions/deletions) of the mnBLL,11q, using WES, we identified a median of 528 (260-1224) variants including a median of 200 (range 121-522) potentially protein-changing alterations. Despite excessive filtering and based on extensive controls of the pipeline we have to take into account that the given numbers include a series of false positive calls i.e. misclassified germline variants.

### *TTN mutations*

To accumulate further evidence that the *TTN* mutations constitute likely passenger mutations, we interrogated the mutation frequency of *TTN* in the projects of ICGC (<https://dcc.icgc.org/>) as well as TCGA (<https://portal.gdc.cancer.gov/>) in which in the majority tumor and matched normal control from the same donor has been sequenced. In 61/72 ICGC projects and 26/33 TCGA projects *TTN* mutations occur in more than 10% of cases which further supports that these mutations should be rather considered as passenger mutations.

### *Functional consequence of NFRKB mutations*

We observed *NFRKB* mutations in four of the mnBLL,11q, cases. By definition of the disease, the loss in 11q24 leads to the deletion of the second *NFRKB* allele. Thus, the tumor cells of these cases carried only the mutated allele. We observed three stopgain mutations, R290\*, K322\* and Q1103\*, as well as a missense R174C mutation. The latter is predicted to perturb adjacent phosphosites (see Figure 2). Most likely, the stopgain mutations lead to nonsense-mediated decay (NMD) and, thus, to complete loss of functional *NFRKB* protein expression. We nevertheless explored whether there could be some residual function of the truncated proteins. The INO80 subunit *NFRKB* is a DNA-binding transcriptional activator. In line with this and the function of the INO80 complex in nucleosome remodeling, *NFRKB* exerts its function in the nucleus. Here, *NFRKB* forms a complex with the deubiquitinating enzyme UCHL5 (Uch37) and other members of the INO80 complex<sup>22,23</sup>. As a prerequisite, transport of the *NFRKB* protein has to be assured. ELM predicts nuclear localization signals (NLS) between amino acids 295 and 325 of *NFRKB*. Thus, R290\* deletes the predicted NLS and the K322\* likely disrupts the NLS. Though we cannot exclude other, not predicted NLS or alternative shuttling mechanisms to the nucleus, these findings suggest again complete ablation of *NFRKB* nuclear function. Despite this strong evidence against a remnant nuclear function of *NFRKB*, we explored published *in vitro* data to investigate the potential impact of the detected *NFRKB* (INO80G) mutations on the INO80 complex. Sahtoe et al.<sup>24</sup> tested different truncated forms of *NFRKB* with regard to UCHL5 activation. They showed, that truncated forms of *NFRKB*, comprising the entire N-terminal DEU domain (amino acids 39-170), lead to inhibition

of UCHL5. Based on these *in vitro* results, the most obvious interpretation of the stopgain mutants (R290\* and K322\*) in the two mnBLL,11q, cases would be that they lead to a NFRKB-DEU fragment that persistently inhibits UCHL5. As a consequence, UCHL5 would not deubiquitinate its substrates leading to impairment of UCHL5 mediated activation of the complex<sup>23</sup>. Finally, the two stop gain mutations R290\* and K322\* are predicted to delete the protein region responsible for mediating interactions with transcriptional regulators and/or DNA. In summary, whatever of the four mechanisms (NMD, loss of nuclear localization, inactivation of UCHL5 or loss of DNA binding) is the most prominent in the tumor cells, at least the two stop gain mutations R290\* and K322\* mutations are predicted to abolish the NFRKB function. The R174C mutation is predicted to perturb adjacent phosphosites, e.g. S176 and is located in a motif predicted by ELM (elm.eu.org) to be either a phosphorylation site of GSK3 and MAP kinase or a docking site for USP7 or the Pin1 WW domain. The C-terminal deletion by Q1103\* is predicted to have detrimental consequences, as it is rich in phosphorylation sites (e.g. CK1 and GSK3) or recognition sites for FHA and WDR5.

In consequence, there is considerable evidence from *in vitro* and structural biology data that the mutations in *NFRKB* wipe out its function. As NFRKB is a DNA-binding protein we next explored ChIP-Seq data from the ENCODE project<sup>25</sup> for NFRKB (in K562 cells) available through the CISTROME data browser (<http://www.cistrome.org/>, accessed 30.10.2018). Remarkably, we detected ChIP-Seq peaks of NFRKB around the transcription start sites of all five differentially overexpressed genes in the 11q minimal region of gain between cases with 11q-gain/loss pattern and IG-MYC BL (*IL10RA*, *ZNF259*, *PAFAH1B2*, *CEP164*, *SIDT2*) but not any of the genes in the minimal region of (homozygous) loss in 11q24 (*ETS1*, *FLI1*, *KCNJ1*, *KCNJ5*, *C11Orf45*, *TP53AIP1*, *ARHGAP32*)<sup>2</sup>. Thus, it is intriguing to speculate that the predicted loss of NFRKB binding and function in the minimal region of gain might be associated with the amplification of the region through altered nucleosome modelling and/or increase gene expression due to altered transcriptional control.

## SUPPLEMENTAL TABLES

### Supplemental Table 1

Overview of molecular cytogenetic and immunophenotype profile of mnBLL, 11q, cases.

| Case                 | Clinical data                                                   |           |     |                 | Molecular Cytogenetics (FISH) |            |             |             | CN profile    | Immunophenotype |      |      |      |     |       | Growth pattern |       | Immune status |
|----------------------|-----------------------------------------------------------------|-----------|-----|-----------------|-------------------------------|------------|-------------|-------------|---------------|-----------------|------|------|------|-----|-------|----------------|-------|---------------|
|                      | Morphological diagnosis                                         | Age (yrs) | Sex | Site            | 11q gain/loss                 | MYC status | BCL2 status | BCL6 status | 11q gain/loss | CD20            | CD10 | BCL2 | BCL6 | EBV | Ki-67 | starry sky     | other |               |
| 4130889 <sup>a</sup> | BL <sup>c</sup>                                                 | 22        | M   | Inguinal LN     | n.a.                          | neg        | neg         | neg         | pos           | +               | +    | -    | -    | -   | >95%  | +              | -     | n.a.          |
| 4132029 <sup>a</sup> | BL <sup>c</sup>                                                 | 37        | F   | Cervical LN     | n.a.                          | neg        | neg         | neg         | pos           | +               | +    | -    | +    | -   | >95%  | +              | -     | n.a.          |
| 4128648 <sup>b</sup> | atypical BL <sup>d</sup>                                        | 9         | M   | Inguinal LN     | n.a.                          | neg        | n.a.        | n.a.        | pos           | +               | +    | -    | +    | -   | 100   | +              | -     | n.a.          |
| 4129295              | BL <sup>e</sup>                                                 | 4         | M   | Cervical LN     | pos                           | neg        | neg         | neg         | pos           | +               | +    | -/+  | n.a. | -   | >95%  | +              | -     | c             |
| 4126556              | FL Grade 3B +DLBCL <sup>e</sup>                                 | 17        | M   | Cervical LN     | pos                           | neg        | neg         | neg         | pos           | +               | +    | -    | +    | -   | 95%   | -              | +(F)  | c             |
| 4140575              | aggressive mature B-cell lymphoma <sup>e</sup>                  | 10        | M   | Iliac crest     | pos                           | neg        | neg         | neg         | pos           | +               | +    | -    | n.a. | -   | 100%  | -              | +(D)  | ID            |
| 4131149              | atypical BL/BL-like <sup>e</sup>                                | 13        | F   | Appendix        | pos                           | neg        | neg         | neg         | pos           | +               | +    | -    | n.a. | -   | ~90%  | +              | -     | c             |
| 4126517              | DLBCL <sup>e</sup>                                              | 52        | M   | Appendix        | pos                           | neg        | neg         | neg         | pos           | +               | +    | -    | n.a. | -   | >90%  | -              | +(N)  | PT            |
| 4132817              | BL <sup>e</sup>                                                 | 14        | F   | Abdominal tumor | pos                           | neg        | neg         | neg         | pos           | +               | +    | -    | n.a. | -   | 90%   | +              | -     | c             |
| 4144899              | Aggressive B-cell lymphoma with follicular pattern <sup>d</sup> | 14        | M   | Cervical LN     | pos                           | neg        | neg         | neg         | pos           | +               | +    | -    | +    | -   | >95%  | +              | +(F)  | n.a.          |
| 4146703              | atypical BL/BL-like <sup>f</sup>                                | 21        | M   | Ileum/Colon     | pos                           | neg        | neg         | neg         | pos           | +               | +    | -    | +    | -   | ~100% | +              | -     | n.a.          |
| 4179429              | B-cell lymphoma <sup>e</sup>                                    | 22        | M   | Abdominal tumor | pos                           | neg        | neg         | neg         | pos           | +               | +    | -    | +    | -   | ~100% | +              | -     | c             |
| 4180189              | BL <sup>e</sup>                                                 | 7         | M   | Ileum           | pos                           | neg        | n.a.        | n.a.        | pos           | +               | +    | +    | +    | -   | ~100% | +              | -     | c             |
| 4180310              | atypical BL/BL-like <sup>f</sup>                                | 51        | F   | LN              | pos*                          | neg        | neg         | neg         | pos*          | +               | -    | +/-  | +/-  | -   | >90%  | +              | -     | n.a.          |
| 4181370              | high grade B-cell lymphoma <sup>g</sup>                         | 21        | M   | Cervical LN     | pos*                          | neg        | neg         | neg         | pos*          | +               | +    | -    | +    | -   | >95%  | +              | +(D)  | c             |

<sup>a</sup> cases have been already published in <sup>1-3</sup>; <sup>b</sup> case has been published in <sup>2</sup>

<sup>c</sup> diagnosis reported by G.R., <sup>d</sup> diagnosis reported by ES.J., <sup>e</sup> diagnosis reported by W.K., <sup>f</sup> diagnosis reported by G.O., <sup>g</sup> diagnosis reported by L.L.,

Age (yrs): age at diagnosis in years; M: Male; F: Female; Site: localization of the tumor analyzed in this study; LN: lymph node; n.a.: not available, neg/-: negative; pos/+: positive; EBV: EBV status determined using EBER ISH; (F): follicular growth pattern; (D): diffuse growth pattern; (N): necrotic tissue; Immune status: PT: post-transplant; ID: immune defect; c: immune competent. \* indicates that only a deletion of chromosome 11q was detected by FISH and OncoScan analysis (Supplemental Figure 1).

## Supplemental Table 2

Overview of copy number alterations in the 12 mnBLL,11q, cases not yet published as identified by OncoScan analysis.

| Case    | Event                       | Chromosomal region in bp (hg19) | Cytoband          | Length in bp |
|---------|-----------------------------|---------------------------------|-------------------|--------------|
| 4129295 | CN Gain                     | chr11:192,764-127,778,007       | 11p15.5 - q24.2   | 127585244    |
|         | CN Loss                     | chr11:127,799,447-133,280,976   | 11q24.2 - q25     | 5481530      |
|         | CN Gain                     | chr11:133,305,660-134,938,847   | 11q25             | 1633188      |
|         | CN Loss                     | chr14:86,454,666-88,383,985     | 114q31.3          | 1929320      |
|         | CN Loss                     | chrY:2,660,163-28,799,935       | Yp11.31 - q11.23  | 26139773     |
| 4126556 | CN Loss                     | chr1:5,126,273-7,758,760        | 1p36.32 - p36.23  | 2632488      |
|         | CN Gain                     | chr8:104,078,514-146,292,734    | 8q22.3 - q24.3    | 42214221     |
|         | CN Gain                     | chr11:58,169,996-122,984,689    | 11q12.1 - q24.1   | 64814694     |
|         | CN Loss                     | chr11:122,996,050-134,938,847   | 11q24.1 - q25     | 11942798     |
|         | CN Gain                     | chr12:1-133,851,895             | 12p13.33 - q24.33 | 133851895    |
| 4140575 | CN Gain                     | chr11:1-119,724,987             | 11p15.5 - q23.3   | 119724987    |
|         | CN Loss                     | chr11:119,742,279-134,938,847   | 11q23.3 - q25     | 15196569     |
|         | CN Gain                     | chr12:1-133,851,895             | 12p13.33 - q24.33 | 133851895    |
| 4131149 | High Copy Gain              | chr1:157,503,805-157,840,353    | 1q23.1            | 336549       |
|         | CNN-LOH                     | chr2:21,494-52,395,370          | 2p25.3 - p16.3    | 52373877     |
|         | CN Gain                     | chr2:52,609,707-58,441,542      | 2p16.3 - p16.1    | 5831836      |
|         | High Copy Gain              | chr2:58,465,027-64,441,643      | 2p16.1 - p14      | 5976617      |
|         | CN Loss                     | chr2:64,464,389-67,796,331      | 2p14              | 3331943      |
|         | High Copy Gain              | chr2:67,875,117-68,354,727      | 2p14              | 479611       |
|         | CN Gain                     | chr3:187,435,688-188,540,034    | 3q27.3 - q28      | 1104347      |
|         | CN Loss                     | chr6:74,785,926-128,946,424     | 6q13 - q22.33     | 54160499     |
|         | CN Gain                     | chr7:41,421-62,008,916          | 7p22.3 - q11.21   | 61967496     |
|         | CN Loss                     | chr7:62,030,337-87,179,086      | 7q11.21 - q21.12  | 25148750     |
|         | CN Loss                     | chr7:105,310,593-105,679,551    | 7q22.3            | 368959       |
|         | CNN-LOH                     | chr7:103,595,652-159,118,443    | 7q22.1 - q36.3    | 55522792     |
|         | CN Gain                     | chr7:105,691,096-159,118,443    | 7q22.3 - q36.3    | 53427348     |
|         | CN Loss                     | chr9:35,291,473-36,343,643      | 9p13.3 - p13.2    | 1052171      |
|         | CN Loss                     | chr9:37,814,873-44,893,094      | 9p13.2 - p11.2    | 7078222      |
|         | CN Gain                     | chr9:123,778,148-124,132,880    | 9q33.2            | 354733       |
|         | CN Gain                     | chr11:58,312,880-87,197,069     | 11q12.1 - q14.2   | 28884190     |
|         | CN Loss                     | chr11:87,220,603-88,256,603     | 11q14.2           | 1036001      |
|         | CN Gain                     | chr11:103,206,043-120,931,054   | 11q22.3 - q23.3   | 17725012     |
|         | CN Loss                     | chr11:120,941,583-128,081,710   | 11q23.3 - q24.3   | 7140128      |
|         | CNN-LOH                     | chr11:128,081,710-128,617,231   | 11q24.3           | 535522       |
|         | CN Loss                     | chr11:128,617,231-134,938,847   | 11q24.3 - q25     | 6321617      |
|         | High Copy Gain              | chr12:11,866,063-11,990,610     | 12p13.2           | 124548       |
|         | CN Gain                     | chr13:41,076,410-41,665,956     | 13q14.11          | 589547       |
|         | CN Loss                     | chr13:82,992,756-84,280,698     | 13q31.1           | 1287943      |
|         | CN Gain                     | chr13:84,302,618-86,213,498     | 13q31.1           | 1910881      |
|         | High Copy Gain              | chr13:86,230,143-97,991,179     | 13q31.1 - q32.1   | 11761037     |
| CN Loss | chr13:98,000,888-99,676,650 | 13q32.1 - q32.3                 | 1675763           |              |



|         |                      |                               |                   |           |
|---------|----------------------|-------------------------------|-------------------|-----------|
|         | High Copy Gain       | chr13:99,685,378-101,287,404  | 13q32.3           | 1602027   |
|         | CN Loss              | chr13:101,298,448-115,103,150 | 13q32.3 - q34     | 13804703  |
|         | High Copy Gain       | chr14:96,031,957-96,178,323   | 14q32.13          | 146367    |
|         | CN Loss              | chr16:59,689,244-61,220,951   | 16q21             | 1531708   |
|         | CN Gain              | chr16:63,963,839-64,975,148   | 16q21             | 1011310   |
|         | CN Loss              | chr16:68,038,763-69,115,649   | 16q22.1           | 1076887   |
|         | CN Loss              | chr17:400,959-22,217,883      | 17p13.3 - p11.1   | 21816925  |
|         | CN Gain              | chr17:77,846,012-78,858,662   | 17q25.3           | 1012651   |
|         | CN Loss              | chr18:21,884,848-28,183,403   | 18q11.2 - q12.1   | 6298556   |
|         | CN Gain              | chr20:46,043,982-46,286,406   | 20q13.12          | 242425    |
| 4126517 | CN Loss              | chr3:48,179,178-54,819,686    | 3p21.31 - p14.3   | 6640509   |
|         | CNN-LOH              | chr4:71,566-15,826,558        | 4p16.3 - p15.32   | 15754993  |
|         | CN Loss              | chr10:73,667,572-94,571,124   | 10q22.1 - q23.33  | 20903553  |
|         | High Copy Gain       | chr11:86,160,140-104,194,241  | 11q14.2 - q22.3   | 18034102  |
|         | CN Gain              | chr11:104,214,465-116,826,870 | 11q22.3 - q23.3   | 12612406  |
|         | High Copy Gain       | chr11:116,829,200-119,488,812 | 11q23.3           | 2659613   |
|         | CN Loss              | chr11:119,502,703-134,938,847 | 11q23.3 - q25     | 15436145  |
|         | High Copy Gain       | chr13:40,604,915-47,851,782   | 13q14.11 - q14.2  | 7246868   |
|         | CN Gain              | chr13:58,232,774-90,952,373   | 13q21.1 - q31.3   | 32719600  |
|         | High Copy Gain       | chr13:90,969,866-94,073,164   | 13q31.3           | 3103299   |
|         | CN Loss              | chr13:94,080,307-115,103,150  | 13q31.3 - q34     | 21022844  |
|         | CNN-LOH              | chr17:400,959-20,539,358      | 17p13.3 - p11.2   | 20138400  |
| 4132817 | CNN-LOH              | chr1:754,192-61,792,008       | 1p36.33 - p31.3   | 61037817  |
|         | CNN-LOH              | chr5:1-180,364,100            | 5p15.33 - q35.3   | 180364100 |
|         | CN Loss              | chr5:180,365,103-180,698,312  | 5q35.3            | 333210    |
|         | CNN-LOH              | chr9:93,708,178-102,619,453   | 9q22.2 - q31.1    | 8911276   |
|         | CN Loss              | chr9:102,639,361-108,417,743  | 9q31.1 - q31.2    | 5778383   |
|         | High Copy Gain       | chr11:60,452,977-64,789,194   | 11q12.2 - q13.1   | 4336218   |
|         | CN Gain              | chr11:64,793,738-120,398,613  | 11q13.1 - q23.3   | 55604876  |
|         | CN Loss              | chr11:120,408,071-127,397,904 | 11q23.3 - q24.2   | 6989834   |
|         | Homozygous Copy Loss | chr11:127,422,804-129,014,488 | 11q24.2 - q24.3   | 1591685   |
| 4144899 | CN Loss              | chr11:129,037,606-134,938,847 | 11q24.3 - q25     | 5901242   |
|         | CN Gain              | chr7:1-159,138,663            | 7p22.3 - q36.3    | 159138663 |
|         | CN Gain              | chr14:20,219,083-106,097,037  | 14q11.2 - q32.33  | 85877955  |
|         | CN Gain              | chr15:20,161,372-77,660,345   | 15q11.1 - q24.3   | 57498974  |
|         | CN Gain              | chrX:1-155,270,560            | Xp22.33 - q28     | 155270560 |
|         | CN Gain              | chr5:1-180,915,260            | 5p15.33 - q35.3   | 180915260 |
|         | CN Gain              | chr21:9,648,315-48,097,610    | 21p11.2 - q22.3   | 38449296  |
|         | CN Gain              | chr11:59,852,596-120,890,823  | 11q12.1 - q23.3   | 61038228  |
|         | CN Gain              | chr12:189,400-133,818,115     | 12p13.33 - q24.33 | 133628716 |
|         | CN Loss              | chr11:120,907,482-134,938,847 | 11q23.3 - q25     | 14031366  |
| 4146703 | CN Loss              | chr2:120,063,684-121,041,347  | 2q14.2            | 977664    |
|         | CNN-LOH              | chr1:149,044,448-249,212,878  | 1q21.2 - q44      | 100168431 |
|         | CN Gain              | chr3:172,056,208-197,852,564  | 3q26.31 - q29     | 25796357  |
|         | High Copy Gain       | chr11:74,145,528-108,384,207  | 11q13.4 - q22.3   | 34238680  |

|         |                      |                               |                   |           |
|---------|----------------------|-------------------------------|-------------------|-----------|
|         | High Copy Gain       | chr11:108,397,460-118,827,925 | 11q22.3 - q23.3   | 10430466  |
|         | CN Loss              | chr11:118,846,574-134,938,847 | 11q23.3 - q25     | 16092274  |
|         | CN Gain              | chr14:66,758,536-67,015,348   | 14q23.3           | 256813    |
| 4179429 | CN Loss              | chr1:2,709,392-9,798,054      | 1p36.32 - p36.22  | 7088663   |
|         | CN Loss              | chr1:240,742,905-242,203,260  | 1q43              | 1460356   |
|         | High Copy Gain       | chr11:64,299,110-65,140,209   | 11q13.1           | 841100    |
|         | CN Gain              | chr11:65,157,820-109,380,008  | 11q13.1 - q22.3   | 44222189  |
|         | High Copy Gain       | chr11:109,404,755-118,486,067 | 11q22.3 - q23.3   | 9081313   |
|         | CN Loss              | chr11:118,501,459-134,938,847 | 11q23.3 - q25     | 16437389  |
|         | Homozygous Copy Loss | chrX:147,606,808-148,029,676  | Xq28              | 422869    |
|         |                      |                               |                   |           |
| 4180189 | CN Gain              | chr3:63,411-24,684,637        | 3p26.3 - p24.2    | 24621227  |
|         | CN Gain              | chr3:26,685,232-60,492,152    | 3p24.1 - p14.2    | 33806921  |
|         | CN Gain              | chr9:30,886,614-32,018,100    | 9p21.1            | 1131487   |
|         | CN Gain              | chr11:71,914,724-103,813,331  | 11q13.4 - q22.3   | 31898608  |
|         | CN Loss              | chr11:103,836,859-114,077,813 | 11q22.3 - q23.2   | 10240955  |
|         | High Copy Gain       | chr11:114,081,947-119,123,704 | 11q23.2 - q23.3   | 5041758   |
|         | CN Gain              | chr11:119,125,745-120,702,378 | 11q23.3           | 1576634   |
|         | CN Loss              | chr11:120,717,000-134,938,847 | 11q23.3 - q25     | 14221848  |
|         | CN Gain              | chr12:47,770,834-126,782,566  | 12q13.11 - q24.32 | 79011733  |
|         | CNN-LOH              | chr17:30,606,301-80,263,427   | 17q11.2 - q25.3   | 49657127  |
|         | CN Gain              | chrX:122,647,089-123,553,985  | Xq25              | 906897    |
| 4180310 | CN Gain              | chr5:171,129,907-180,698,312  | 5q35.1 - q35.3    | 9568406   |
|         | CNN-LOH              | chr10:47,009,329-135,434,303  | 10q11.22 - q26.3  | 88424975  |
|         | CN Gain              | chr11:69,449,533-69,480,191   | 11q13.3           | 30659     |
|         | CN Loss              | chr11:121,665,295-134,938,847 | 11q24.1 - q25     | 13273553  |
|         | CN Gain              | chr16:83,887-2,303,083        | 16p13.3           | 2219197   |
|         | CNN-LOH              | chr19:247,232-13,221,838      | 19p13.3 - p13.2   | 12974607  |
| 4181370 | CNN-LOH              | chr1:144,009,053-249,212,878  | 1q21.1 - q44      | 105203826 |
|         | CN Gain              | chr4:62,406,893-63,075,798    | 4q13.1            | 668906    |
|         | CNN-LOH              | chr6:204,909-37,144,404       | 6p25.3 - p21.2    | 36939496  |
|         | CN Gain              | chr11:110,879,863-112,008,978 | 11q23.1           | 1129116   |
|         | CN Loss              | chr11:121,206,488-134,938,847 | 11q24.1 - q25     | 13732360  |
|         | CN Gain              | chr12:1-133,851,895           | 12p13.33 - q24.33 | 133851895 |

CN: copy number, CNN-LOH: copy number neutral loss of heterozygosity

### Supplemental Table 4

PCR primers and PCR conditions for Sanger sequencing applied for verification of *GNA13* and *NFRKB* mutations detected by whole-exome sequencing.

| Gene             | Case with mutation      | Genomic region in bp (hg19) | Forward primer (5'-3')  | Annealing Temp. <sup>1</sup> | PCR <sup>2</sup> (bp) |
|------------------|-------------------------|-----------------------------|-------------------------|------------------------------|-----------------------|
|                  |                         |                             | Reverse primer (5'-3')  |                              |                       |
| <i>GNA13</i>     | 4146703, 4126556        | chr17:63010217-63010438     | AAACCAAAGGCCGCAGAAAA    | 60°C                         | 224 bp                |
|                  |                         |                             | TGTTTTCCGTGACGTGAAGG    |                              |                       |
|                  | 4130889                 | chr17:63010356-63010564     | ACAGCAAGTCTTTTGTACATCAC | 60°C                         | 209 bp                |
|                  |                         |                             | TCCCCACTGCTTAAGAGACG    |                              |                       |
|                  | 4132029, 4132817        | chr17:63010657-63010905     | GACATTGCTGAAAACCCGGT    | 60°C                         | 249 bp                |
|                  |                         |                             | CCCACCAAAGGCATCCATG     |                              |                       |
|                  | 4132029, 4130889        | chr17:63014306-63014554     | ACATCGATATCCTGACTTCTGCT | 60°C                         | 249 bp                |
|                  |                         |                             | AGCTGTCTGAAATTGGTGACT   |                              |                       |
|                  | 4132817                 | chr17:63049477-63049764     | GCCTTAGCCTTTCAGTCTG     | 55°C                         | 288 bp                |
|                  |                         |                             | GATGTCGTTTGATACCCGGG    |                              |                       |
| 4181370, 4128648 | chr17:63052197-63052588 | GGGAGACAAGCGGGAGAG          | 60°C                    | 392 bp                       |                       |
|                  |                         | AAGACCTATGTGAAGCGGCT        |                         |                              |                       |
| <i>NFRKB</i>     | 4180189                 | chr11:129739500-129739695   | CTTGGACACAGCAGCATTCA    | 60°C                         | 196 bp                |
|                  |                         |                             | CACAGTGGCCTCTTCAGAAG    |                              |                       |
|                  | 4144899                 | chr11:129752395-129752591   | GTGCGACCCCTTCAGTACT     | 60°C                         | 197 bp                |
|                  |                         |                             | TAAGACCCCTCACTTCCCTG    |                              |                       |
|                  | 4146703                 | chr11:129752962-129753169   | ACGCAACTTAACACCATAGTCA  | 60°C                         | 208 bp                |
|                  |                         |                             | TGGCAAAGTCACCTCAGTTT    |                              |                       |
|                  | 4126517                 | chr11:129755320-129755544   | GGACTCACCCTCTTCATCA     | 60°C                         | 225 bp                |
|                  |                         |                             | CTTGATGATGACTTGTAACCC   |                              |                       |

<sup>1</sup> Annealing temperature in °C, <sup>2</sup> Length of PCR product in base pairs (bp)

## SUPPLEMENTAL FIGURES

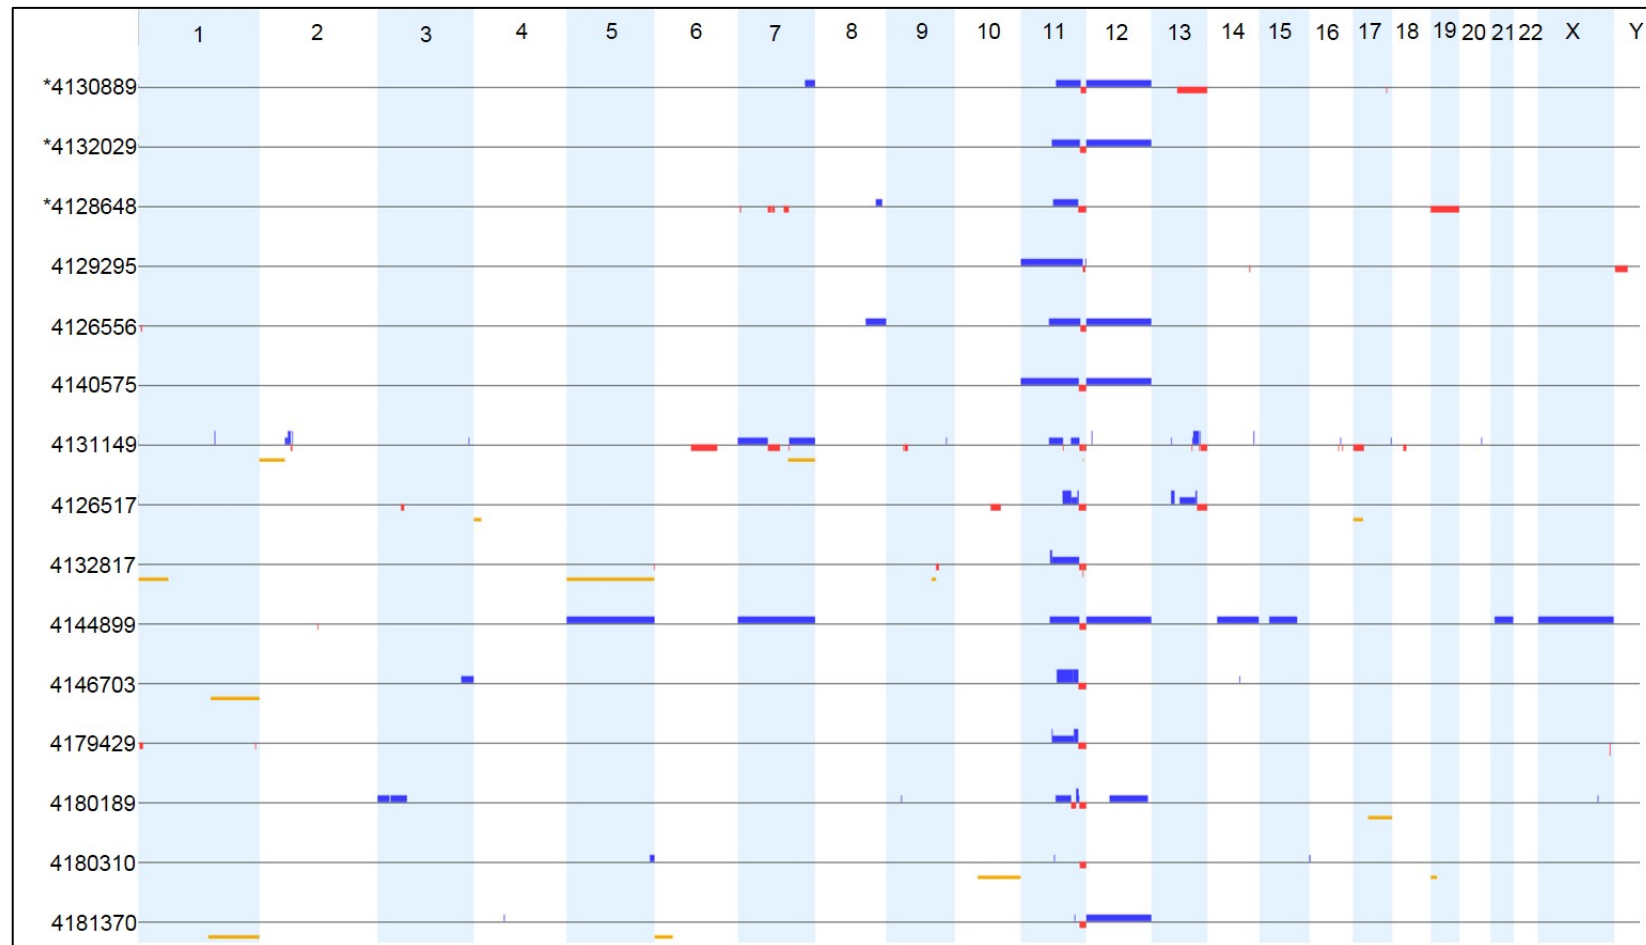

Supplemental Figure 1: Overview of the copy number alterations in 15 mnBLL,11q, cases (the asterisks indicate that these profiles have been already published<sup>2</sup>). Each line corresponds to one case. Blue bars depict copy number gains, red bars copy number losses and yellow bars copy number neutral losses of heterozygosity. The minimal region of gain was defined as 11q23.2-q23.3 (chr11:114,081,947-118,434,149bp, hg19) and the minimal region of loss as (chr11:127,799,447-133,280,976bp, hg19) which overlapped with those described previously but reduced their sizes<sup>2</sup>. One case of the present series (4132817) harbored a focal homozygous loss in 11q24.2-q24.3, which overlaps with a homozygously deleted region in cases recently published<sup>2,3</sup>. The most recurrently altered regions were besides the 11q-gain/loss, a partial trisomy 12q13.11-q24.32 (7/15 cases), gain in 7q34-qter and loss in 13q32.3-q34 each in 3/15 cases.

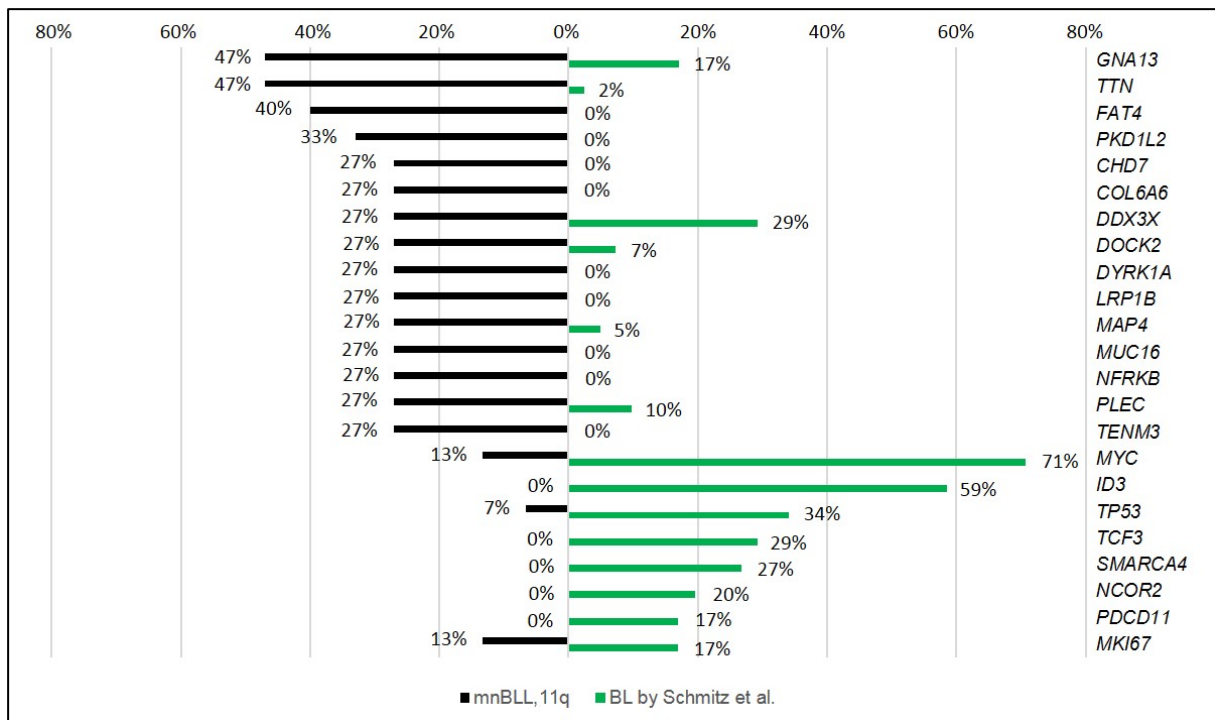

Supplemental Figure 2: Comparison of frequently mutated genes in mnBLL,11q, (black) and BL (green). Included are those genes which were reported by Schmitz et al.<sup>26</sup> to be recurrently mutated in at least 15% of BL cases (N=41 cases, 69,6% younger than 18 years at diagnosis) in the respective study as well as genes which were recurrently mutated in more than 15% of mnBLL,11q, cases. Using the published mutational landscape of BL by Schmitz et al.<sup>26</sup>, we could show again that the highly recurrently mutated genes in BL were not or only rarely altered in mnBLL,11q. The exception to this are *DDX3X* and *GNA13*, which were recurrently mutated in both lymphoma entities (>15%).

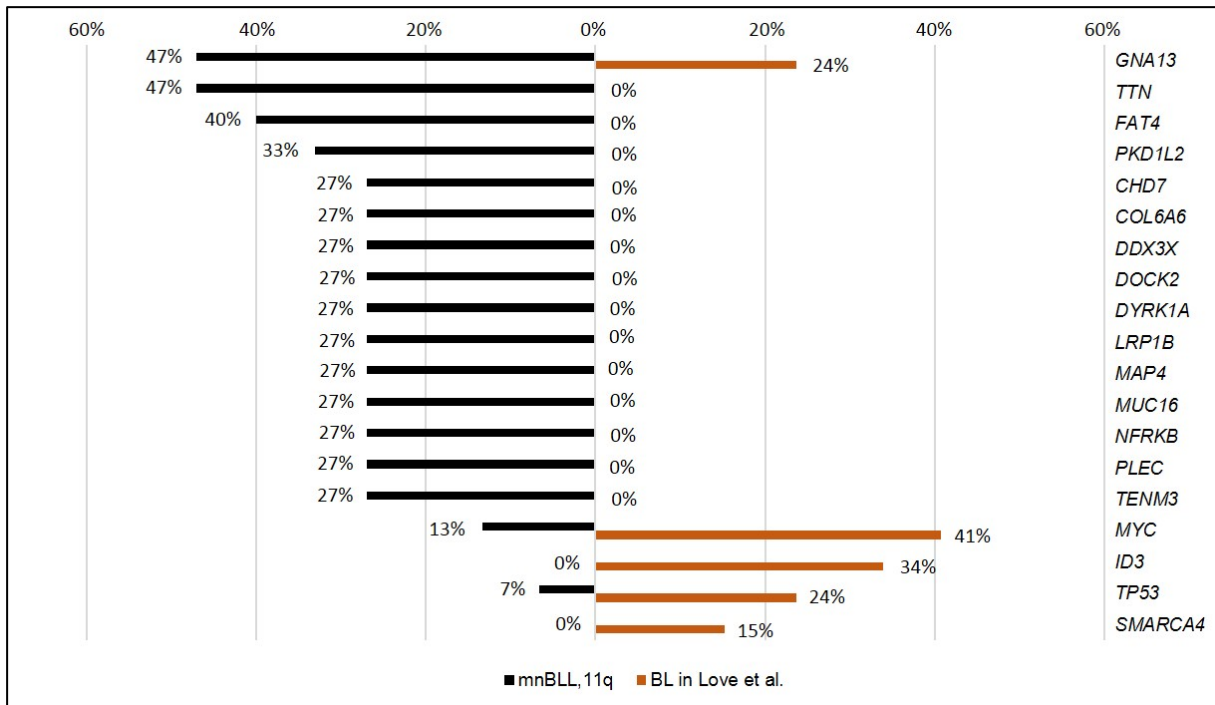

Supplemental Figure 3: Comparison of frequently mutated genes in mnBLL,11q, (black) and BL (orange). Included are those genes which were reported by Love et al.<sup>27</sup> to be recurrently mutated in at least 15% of BL cases (N=59 cases, median age at diagnosis, as available for 27 cases, was 19 (3-82) years ) in the respective study as well as genes which were recurrently mutated in more than 15% of mnBLL,11q, cases. Using the published mutational landscape of BL by Love at al.<sup>27</sup>, we could show again that the highly recurrently mutated genes in BL were not or only rarely altered in mnBLL,11q. The exception to this were the *GNA13* mutations occurring frequently in both lymphoma entities (>15%).

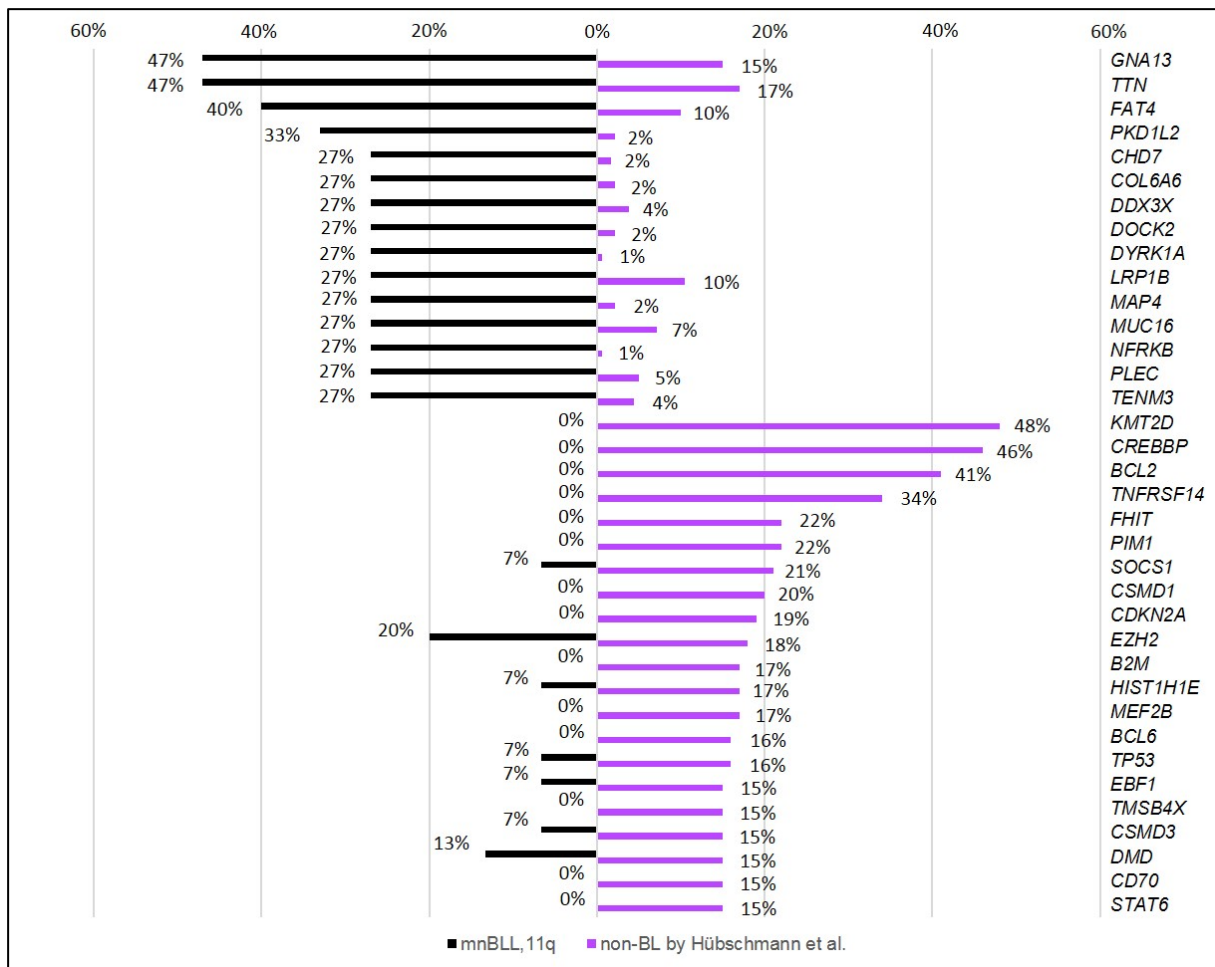

Supplemental Figure 4: Comparison of frequently mutated genes in 15 mnBLL,11q, cases (black) and 181 non-BL (median age at diagnosis 63 (range 33-89) years) including diffuse-large B cell lymphoma (DLBCL), follicular lymphoma (FL) and FL-DLBCL (violet). Included are those genes which were mutated in  $\geq 15\%$  of non-BL cases based on unpublished data from whole genome sequencing accessible at [www.icgc.org](http://www.icgc.org) (Hübschmann *et al.* submitted) as well as genes which were recurrently mutated in more than 15% of mnBLL,11q, cases. The mutational landscape of the mnBLL,11q cases was overall different than that from non-BL samples. Nevertheless, few genes were recurrently mutated in both lymphoma groups including *EZH2*, *GNA13* and *TTN* ( $\geq 15\%$ ).

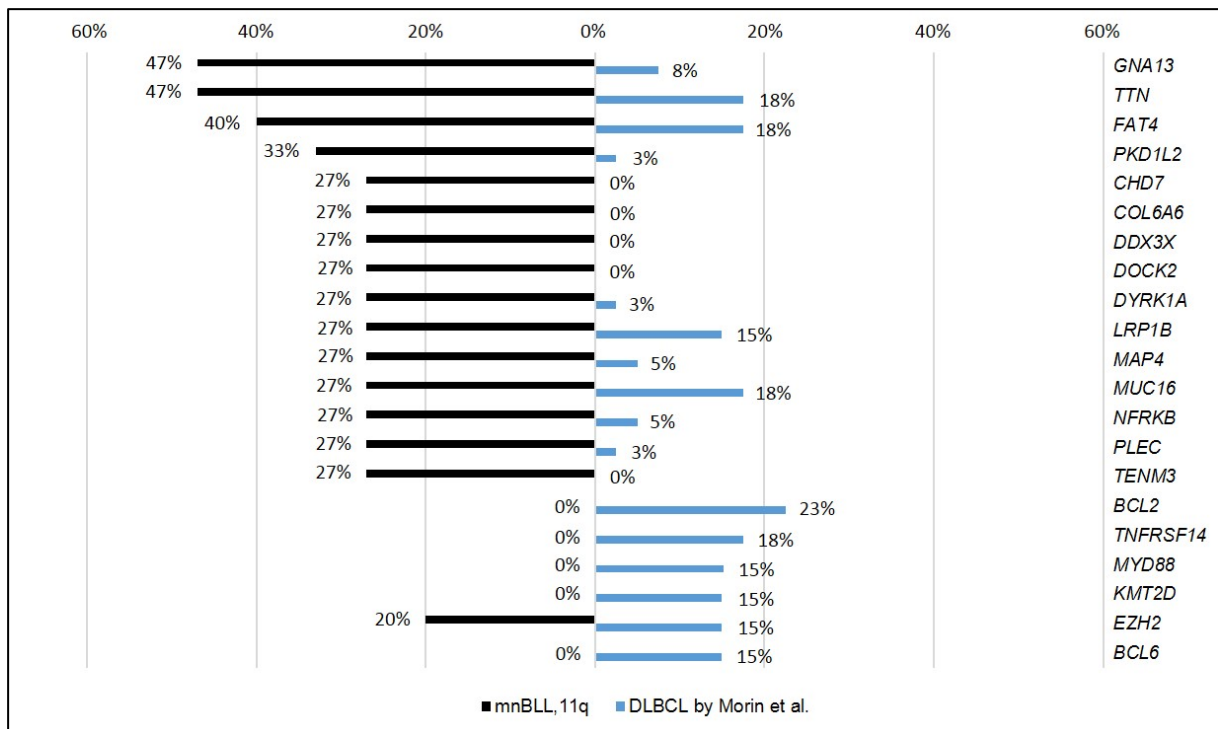

Supplemental Figure 5: Comparison of frequently mutated genes in mnBLL,11q, (black) and diffuse-large B cell lymphoma (DLBCL) (blue). Included are those genes which were mutated in  $\geq 15\%$  of DLBCL as reported by Morin et al.<sup>28</sup> (age at diagnosis unknown) as well as genes which were recurrently mutated in more than 15% of mnBLL,11q, cases. Few genes were recurrently mutated in both lymphoma entities including *EZH2*, *TTN*, *FAT4*, as well as *MUC16* ( $>15\%$ ).

Remarkably, exome analyses in recently published large series of DLBCL<sup>29–32</sup> have only rarely reported protein-changing *NFRKB* mutations in DLBCL (total 22/1031 DLBCL (2%) based on<sup>30–32</sup>). The gene was moreover not detected as driver gene in DLBCL by Reddy et al.<sup>29</sup>. Mining the publically available data by Reddy et al.<sup>29</sup> identified 21 pediatric/young adult DLBCL cases ( $<25$  years at diagnosis) for which the driver gene mutations per case were provided. Of the 150 driver genes, only two overlap with the genes we identified as frequently mutated in mnBLL,11q, namely *GNA13* and *DDX3X*. These were mutated in only 1/21 and 0/21 of the pediatric/young adulthood DLBCL cases, respectively. Hence, we can indirectly (absence of *NFRKB* as driver gene) and directly (frequency of driver gene mutations) conclude from this data that the mutational spectrum of mnBLL,11q, is quite different from that of pediatric/young adult DLBCL.



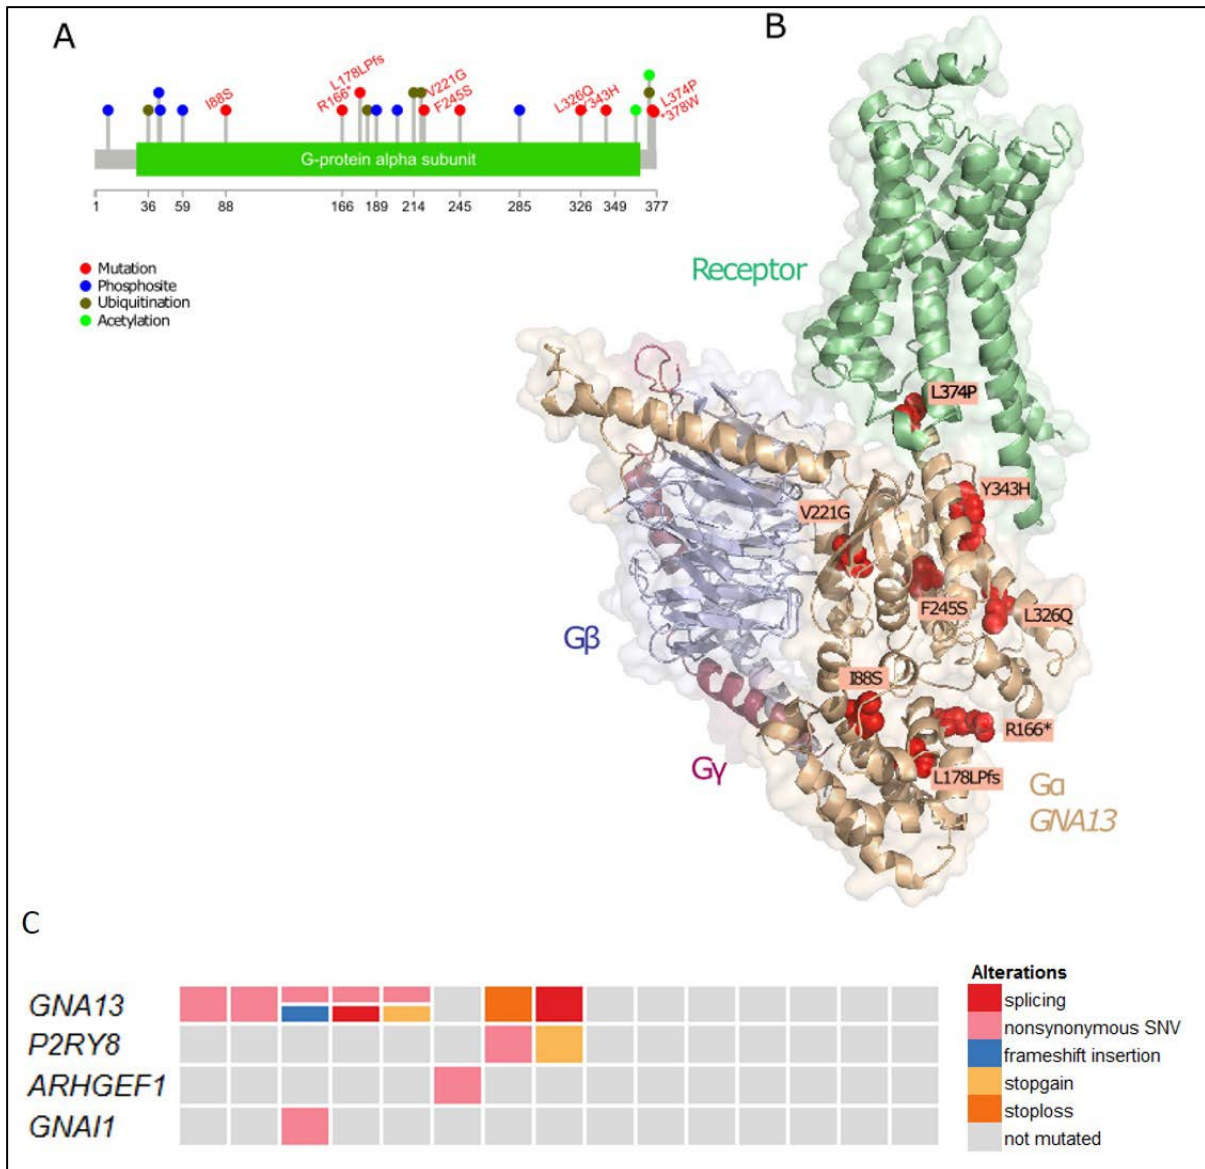

Supplemental Figure 6: (A) Localization of the *GNA13* mutations (red lollipops) annotated on protein primary sequence (based on ENST00000439174.2) with additional information regarding post-translocation modifications (PTMs) and domain composition. The majority of mutations were nonsynonymous, which are located within the catalytic Ras and  $\alpha$ -helical domains of the G-protein alpha subunit. The stopgain mutation leads to a loss of the C-terminal part of the protein. The stopgain mutation leads to a loss of the C-terminal part of the protein.

(B) Mutated residues (red spheres) shown on a model of heterotrimeric G13 (G $\alpha$  in wheat, G $\beta$  in blue and G $\gamma$  in raspberry) bound to a G-protein coupled receptor (green). The prototypical structure of ADRB2 receptor complexed to Gs heterotrimer (PDB ID: 3SN6) has been used as a template to model the quaternary complex (see Methods section "Mutation modeling").

(C) Depicted are the protein changing mutations within the G<sub>12/13</sub> and G<sub>i</sub> $\alpha$  signaling pathway<sup>33</sup>. The columns encode samples and the rows different genes. Different mutation types are color-coded in the oncoprint, where different types of mutation can coexist in one sample. 53% (8/15) of mnBLL,11q, cases harbored a mutation within this signaling pathway.

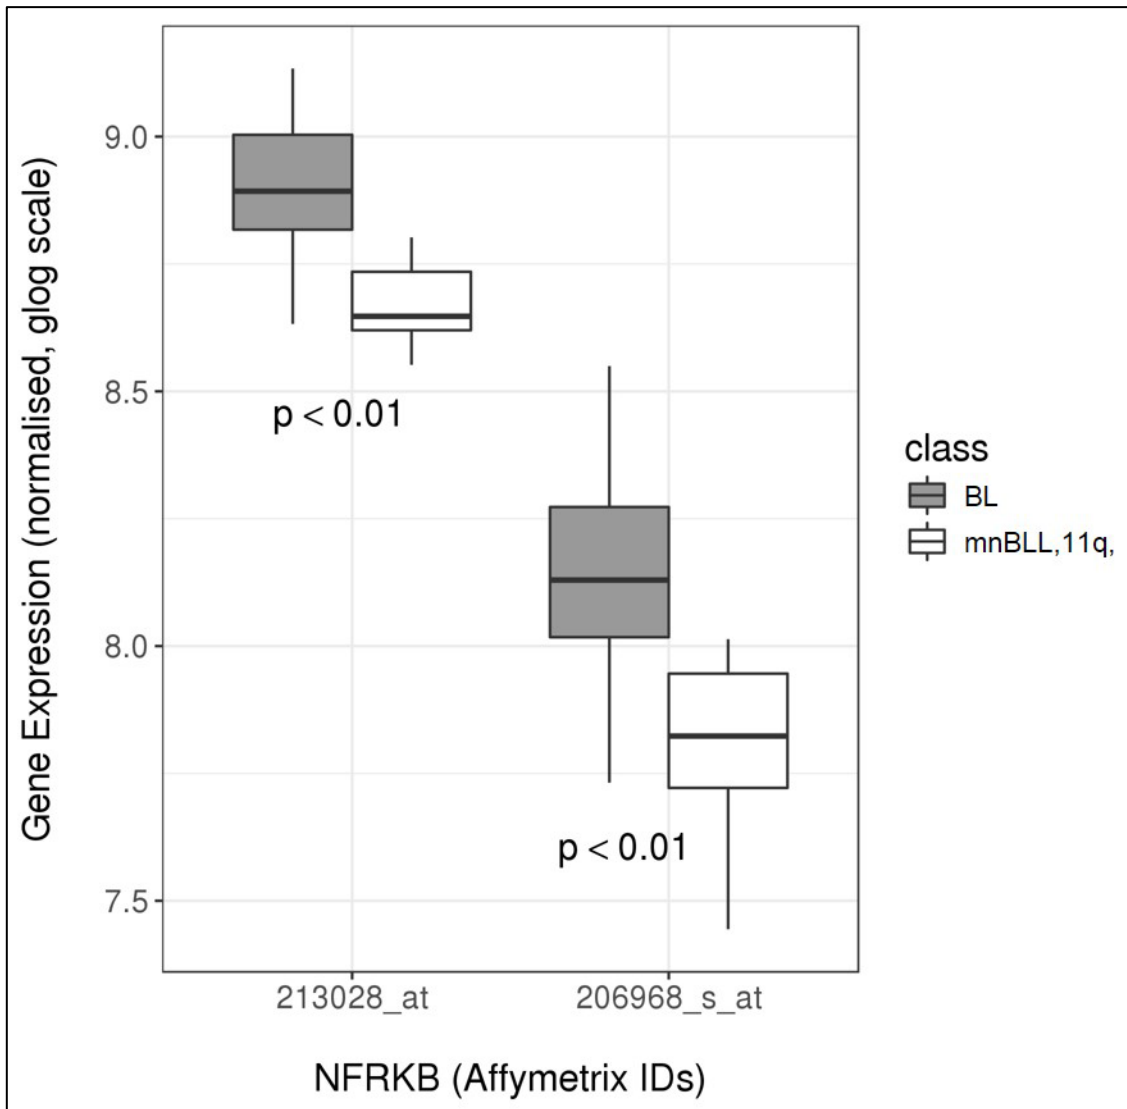

Supplemental Figure 7: NFRKB expression levels in mnBLL,11q, cases and Burkitt lymphoma (BL) based on Affymetrix U133A expression arrays as published by <sup>2</sup>. The boxplots show that NFRKB is significantly lower expressed in the mnBLL,11q, cases compared to BL (adj.  $p < 0.01$ ).

## SUPPLEMENTAL REFERENCES

1. Pienkowska-Grela B, Rymkiewicz G, Grygalewicz B, et al. Partial trisomy 11, dup(11)(q23q13), as a defect characterizing lymphomas with Burkitt pathomorphology without MYC gene rearrangement. *Med. Oncol.* 2011;28(4):1589–1595.
2. Salaverria I, Martin-Guerrero I, Wagener R, et al. A recurrent 11q aberration pattern characterizes a subset of MYC-negative high-grade B-cell lymphomas resembling Burkitt lymphoma. *Blood.* 2014;123(8):1187–1198.
3. Rymkiewicz G, Grygalewicz B, Chechlinska M, et al. A comprehensive flow-cytometry-based immunophenotypic characterization of Burkitt-like lymphoma with 11q aberration. *Mod. Pathol.* 2018;31(5):732–743.
4. Bonetti P, Testoni M, Scandurra M, et al. Deregulation of ETS1 and FLI1 contributes to the pathogenesis of diffuse large B-cell lymphoma. *Blood.* 2013;122(13):2233–2241.
5. Scholtysik R, Kreuz M, Hummel M, et al. Characterization of genomic imbalances in diffuse large B-cell lymphoma by detailed SNP-chip analysis. *Int. J. Cancer.* 2015;136(5):1033–1042.
6. Ventura RA, Martin-Subero JI, Jones M, et al. FISH analysis for the detection of lymphoma-associated chromosomal abnormalities in routine paraffin-embedded tissue. *J Mol Diagn.* 2006;8(2):141–151.
7. Martín-Subero JI, Harder L, Gesk S, et al. Interphase FISH assays for the detection of translocations with breakpoints in immunoglobulin light chain loci. *Int. J. Cancer.* 2002;98(3):470–474.
8. Hummel M, Bentink S, Berger H, et al. A biologic definition of Burkitt's lymphoma from transcriptional and genomic profiling. *N. Engl. J. Med.* 2006;354(23):2419–2430.
9. Wagener R, López C, Kleinheinz K, et al. IG-MYC+ neoplasms with precursor B-cell phenotype are molecularly distinct from Burkitt lymphomas. *Blood.* 2018;132(21):2280–2285.
10. Li H, Handsaker B, Wysoker A, et al. The Sequence Alignment/Map format and SAMtools. *Bioinformatics.* 2009;25(16):2078–2079.
11. Sherry ST, Ward MH, Kholodov M, et al. dbSNP: the NCBI database of genetic variation. *Nucleic Acids Res.* 2001;29(1):308–311.
12. Jabs J, Zickgraf FM, Park J, et al. Screening drug effects in patient-derived cancer cells links organoid responses to genome alterations. *Mol. Syst. Biol.* 2017;13(11):955.
13. Lek M, Karczewski KJ, Minikel EV, et al. Analysis of protein-coding genetic variation in 60,706 humans. *Nature.* 2016;536(7616):285–291.
14. Nik-Zainal S, Alexandrov LB, Wedge DC, et al. Mutational processes molding the genomes of 21 breast cancers. *Cell.* 2012;149(5):979–993.
15. Lawrence MS, Stojanov P, Polak P, et al. Mutational heterogeneity in cancer and the search for new cancer-associated genes. *Nature.* 2013;499(7457):214–218.
16. Reva B, Antipin Y, Sander C. Predicting the functional impact of protein mutations: application to cancer genomics. *Nucleic Acids Res.* 2011;39(17):e118.
17. McLaren W, Gil L, Hunt SE, et al. The Ensembl Variant Effect Predictor. *Genome Biol.* 2016;17(1):122.
18. Betts MJ, Lu Q, Jiang Y, et al. Mechismo: predicting the mechanistic impact of mutations and modifications on molecular interactions. *Nucleic Acids Res.* 2015;43(2):e10.
19. Jay JJ, Brouwer C. Lollipops in the Clinic: Information Dense Mutation Plots for Precision Medicine. *PLoS ONE.* 2016;11(8):e0160519.
20. Hornbeck PV, Zhang B, Murray B, et al. PhosphoSitePlus, 2014: mutations, PTMs and recalibrations. *Nucleic Acids Res.* 2015;43(Database issue):D512–520.
21. Sali A, Blundell TL. Comparative protein modelling by satisfaction of spatial restraints. *J. Mol. Biol.* 1993;234(3):779–815.
22. Yao T, Song L, Jin J, et al. Distinct modes of regulation of the Uch37 deubiquitinating enzyme in the proteasome and in the Ino80 chromatin-remodeling complex. *Mol. Cell.* 2008;31(6):909–917.
23. Zediak VP, Berger SL. Hit and run: transient deubiquitylase activity in a chromatin-remodeling complex. *Mol. Cell.* 2008;31(6):773–774.
24. Sahtoe DD, van Dijk WJ, El Oualid F, et al. Mechanism of UCH-L5 activation and inhibition by DEUBAD domains in RPN13 and INO80G. *Mol. Cell.* 2015;57(5):887–900.
25. Davis CA, Hitz BC, Sloan CA, et al. The Encyclopedia of DNA elements (ENCODE): data portal update. *Nucleic Acids Res.* 2018;46(D1):D794–D801.
26. Schmitz R, Young RM, Ceribelli M, et al. Burkitt lymphoma pathogenesis and therapeutic targets from structural and functional genomics. *Nature.* 2012;490(7418):116–120.
27. Love C, Sun Z, Jima D, et al. The genetic landscape of mutations in Burkitt lymphoma. *Nat. Genet.* 2012;44(12):1321–1325.

28. Morin RD, Mungall K, Pleasance E, et al. Mutational and structural analysis of diffuse large B-cell lymphoma using whole-genome sequencing. *Blood*. 2013;122(7):1256–1265.
29. Reddy A, Zhang J, Davis NS, et al. Genetic and Functional Drivers of Diffuse Large B Cell Lymphoma. *Cell*. 2017;171(2):481-494.e15.
30. Arthur SE, Jiang A, Grande BM, et al. Genome-wide discovery of somatic regulatory variants in diffuse large B-cell lymphoma. *Nat Commun*. 2018;9(1):4001.
31. Chapuy B, Stewart C, Dunford AJ, et al. Molecular subtypes of diffuse large B cell lymphoma are associated with distinct pathogenic mechanisms and outcomes. *Nat. Med*. 2018;24(5):679–690.
32. Schmitz R, Wright GW, Huang DW, et al. Genetics and Pathogenesis of Diffuse Large B-Cell Lymphoma. *N. Engl. J. Med*. 2018;378(15):1396–1407.
33. Muppidi JR, Schmitz R, Green JA, et al. Loss of signalling via Gα13 in germinal centre B-cell-derived lymphoma. *Nature*. 2014;516(7530):254–258.

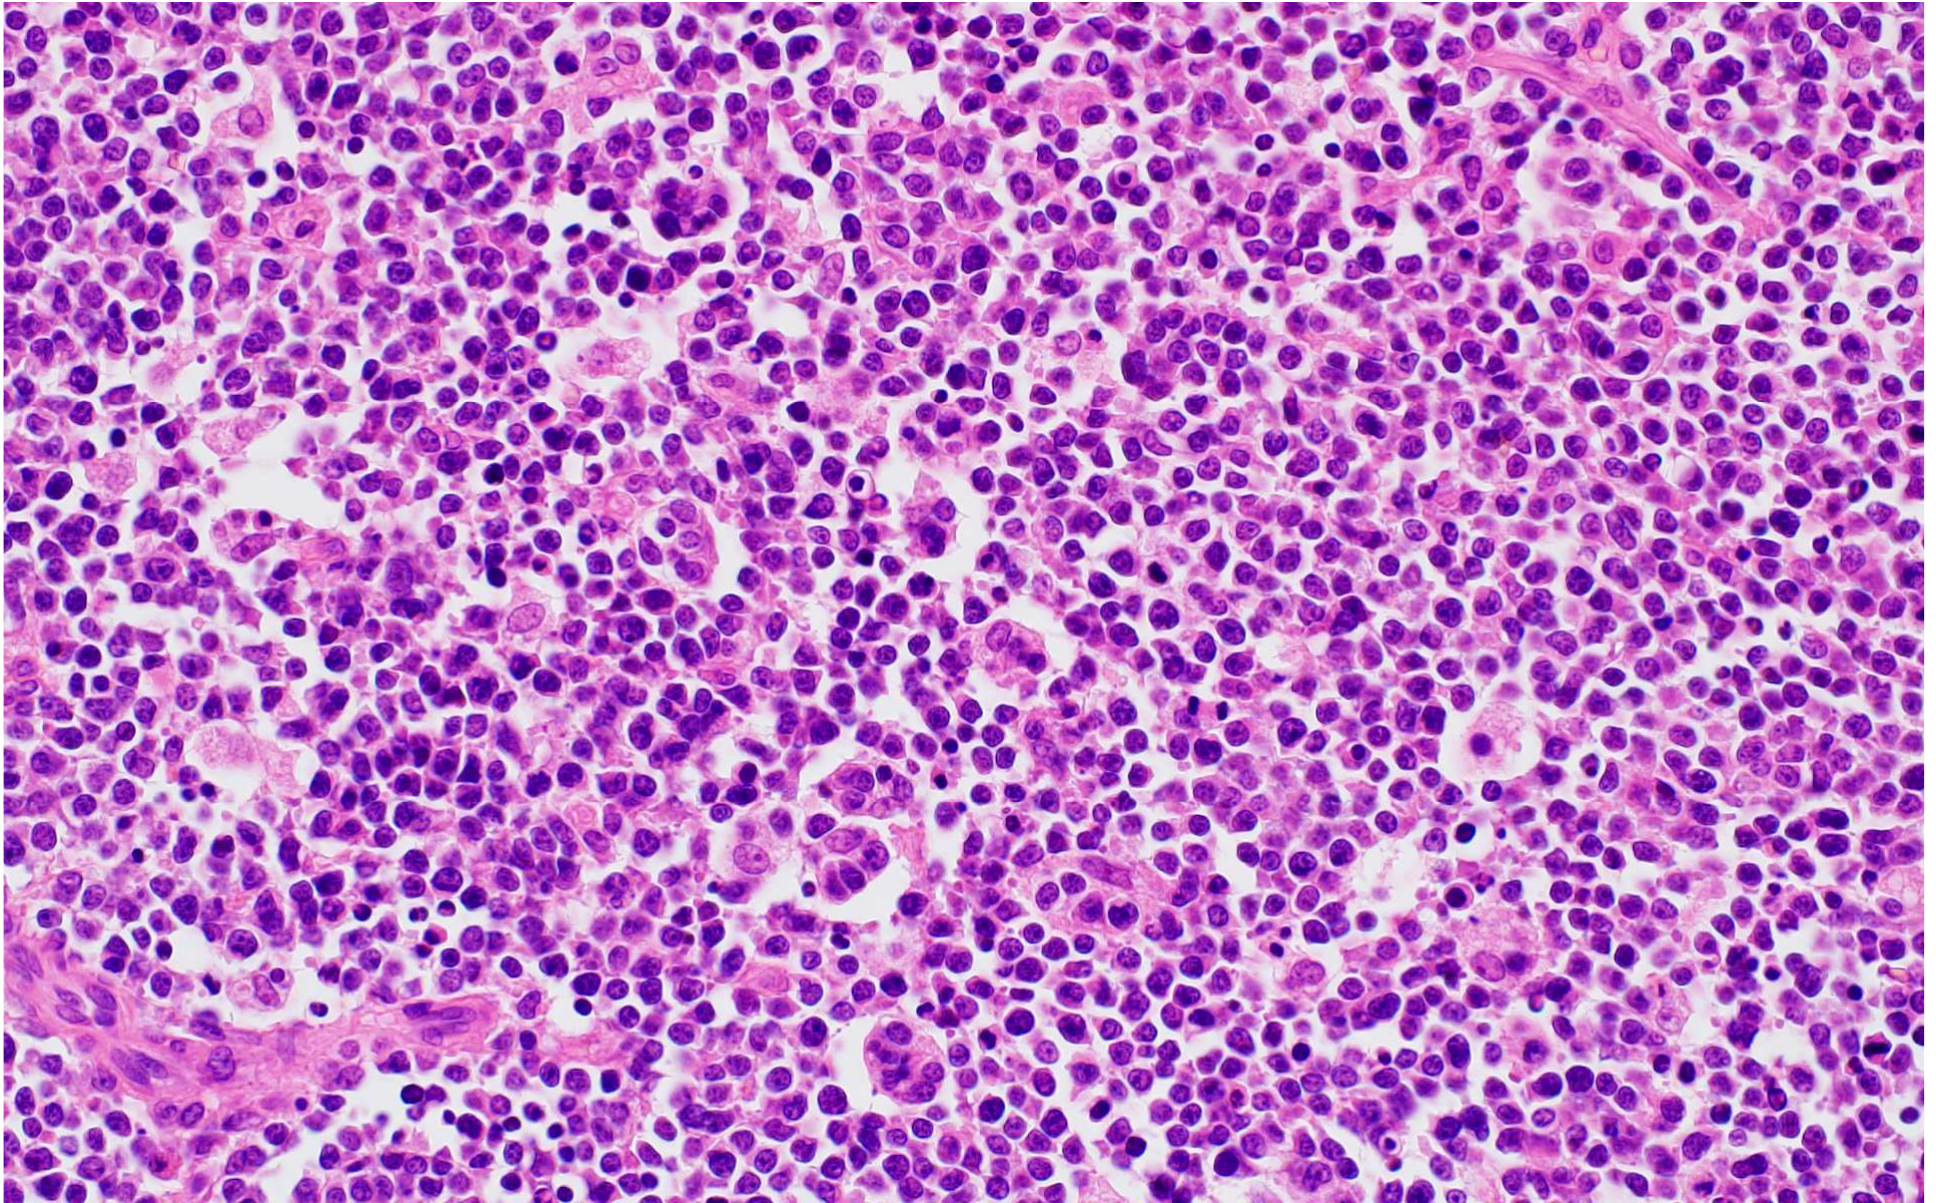

4130889, 400x

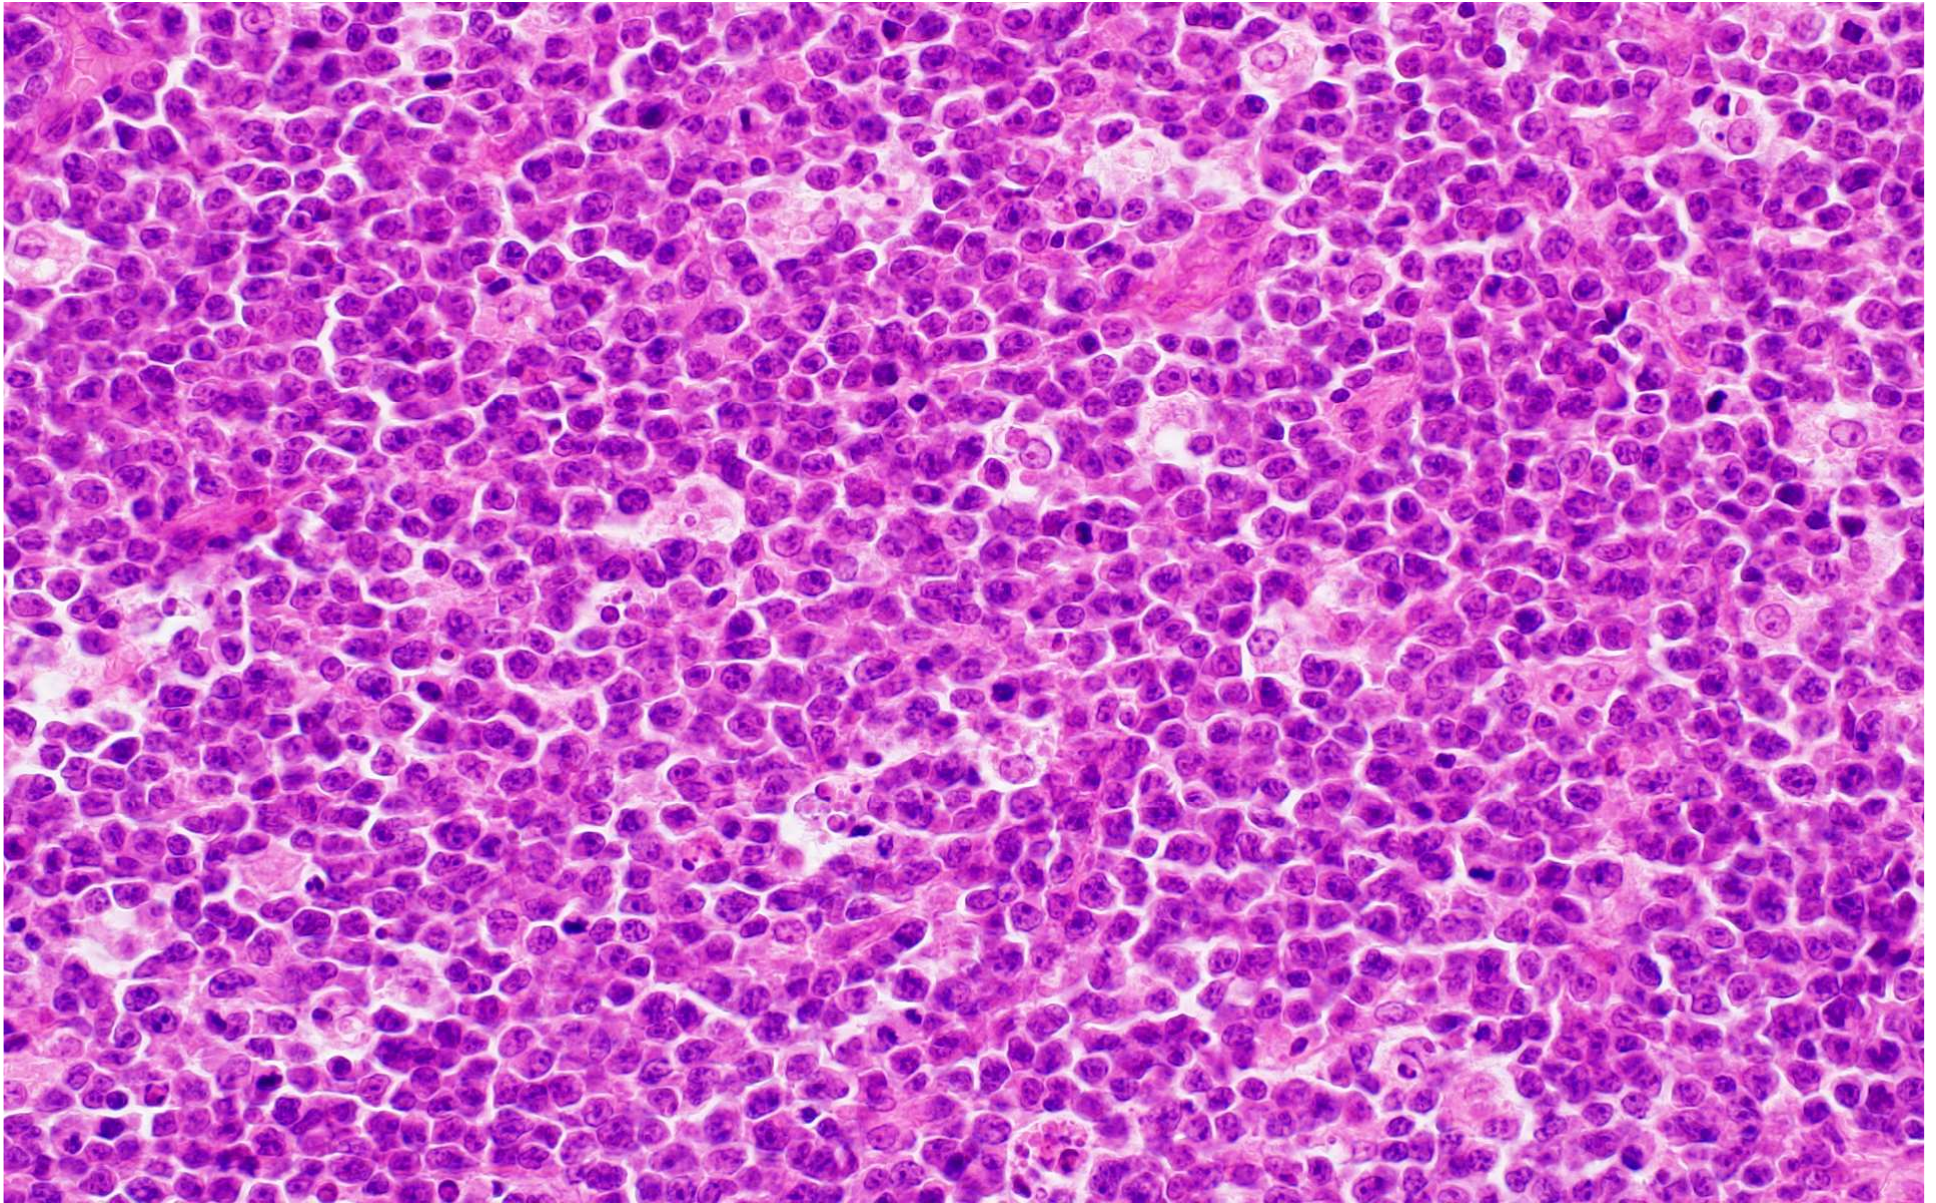

4132029, 400x

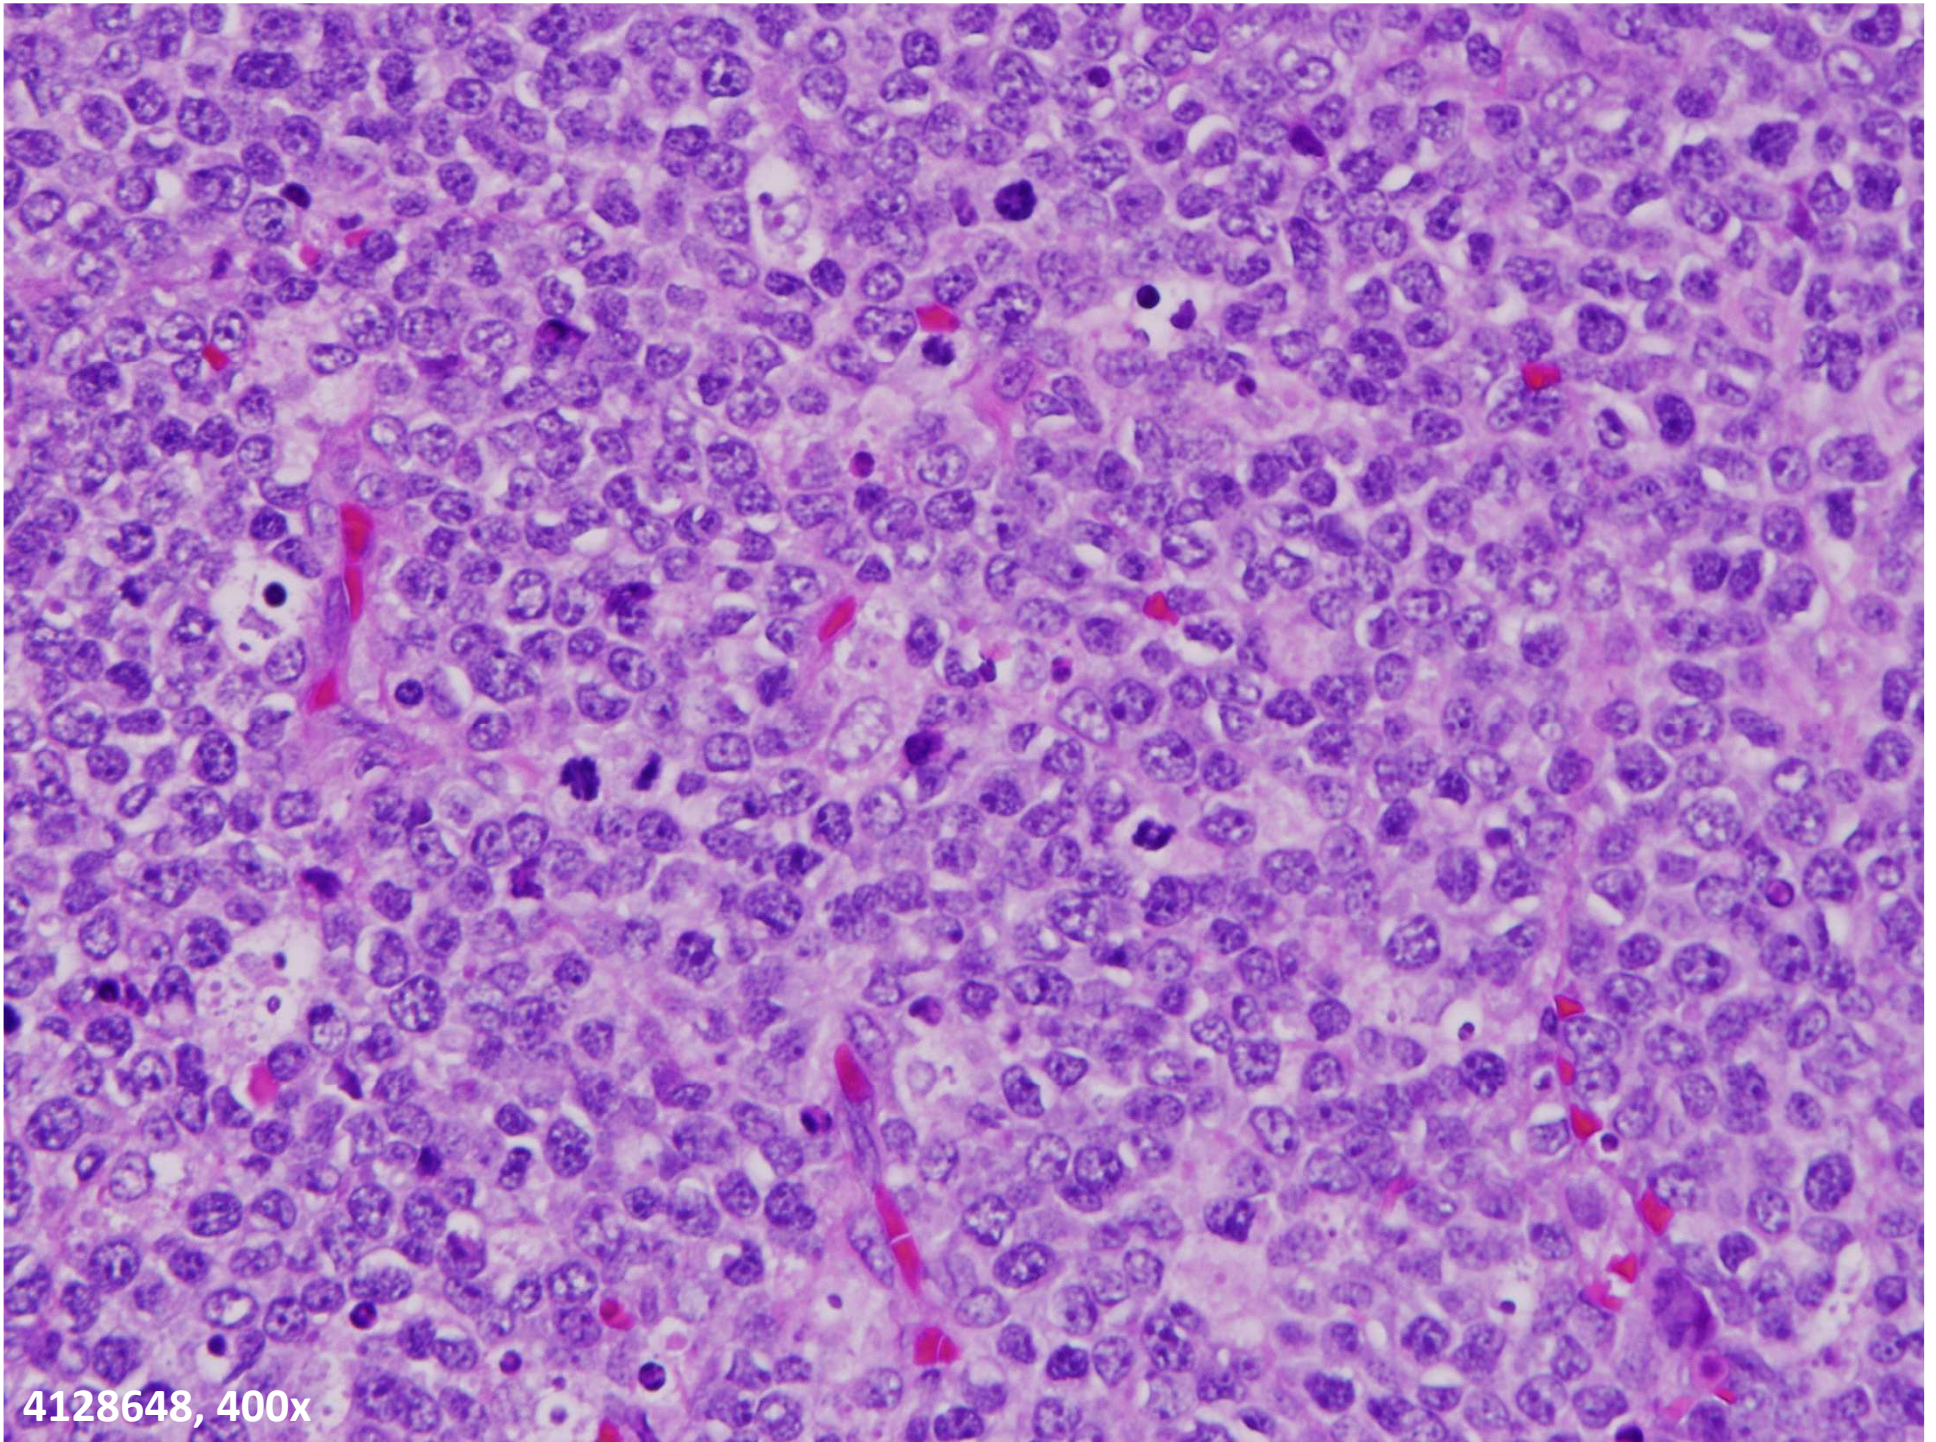

4128648, 400x

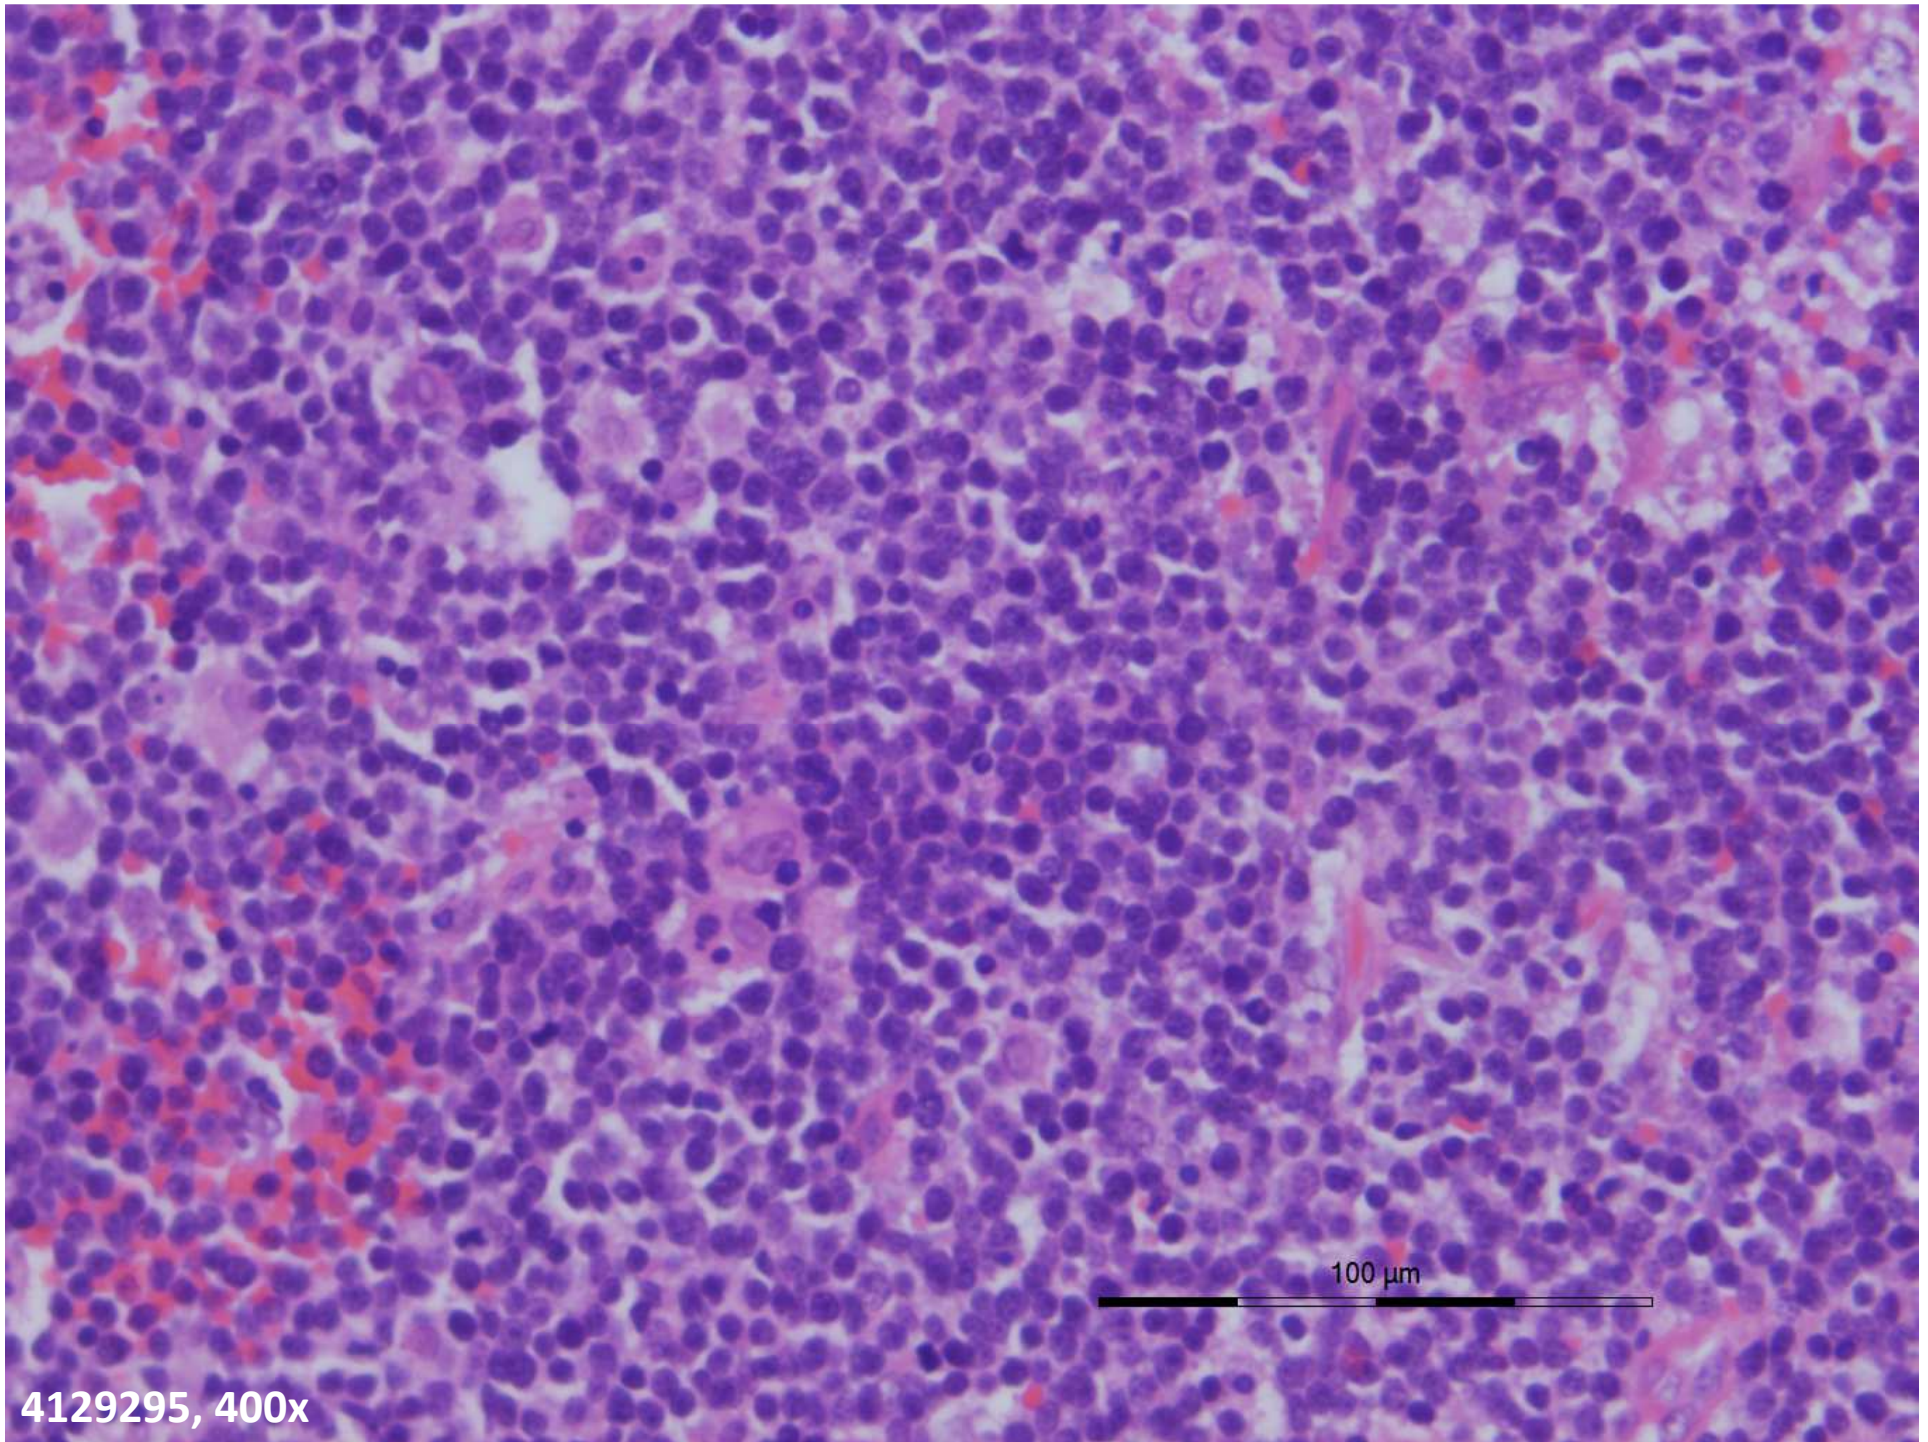

4129295, 400x



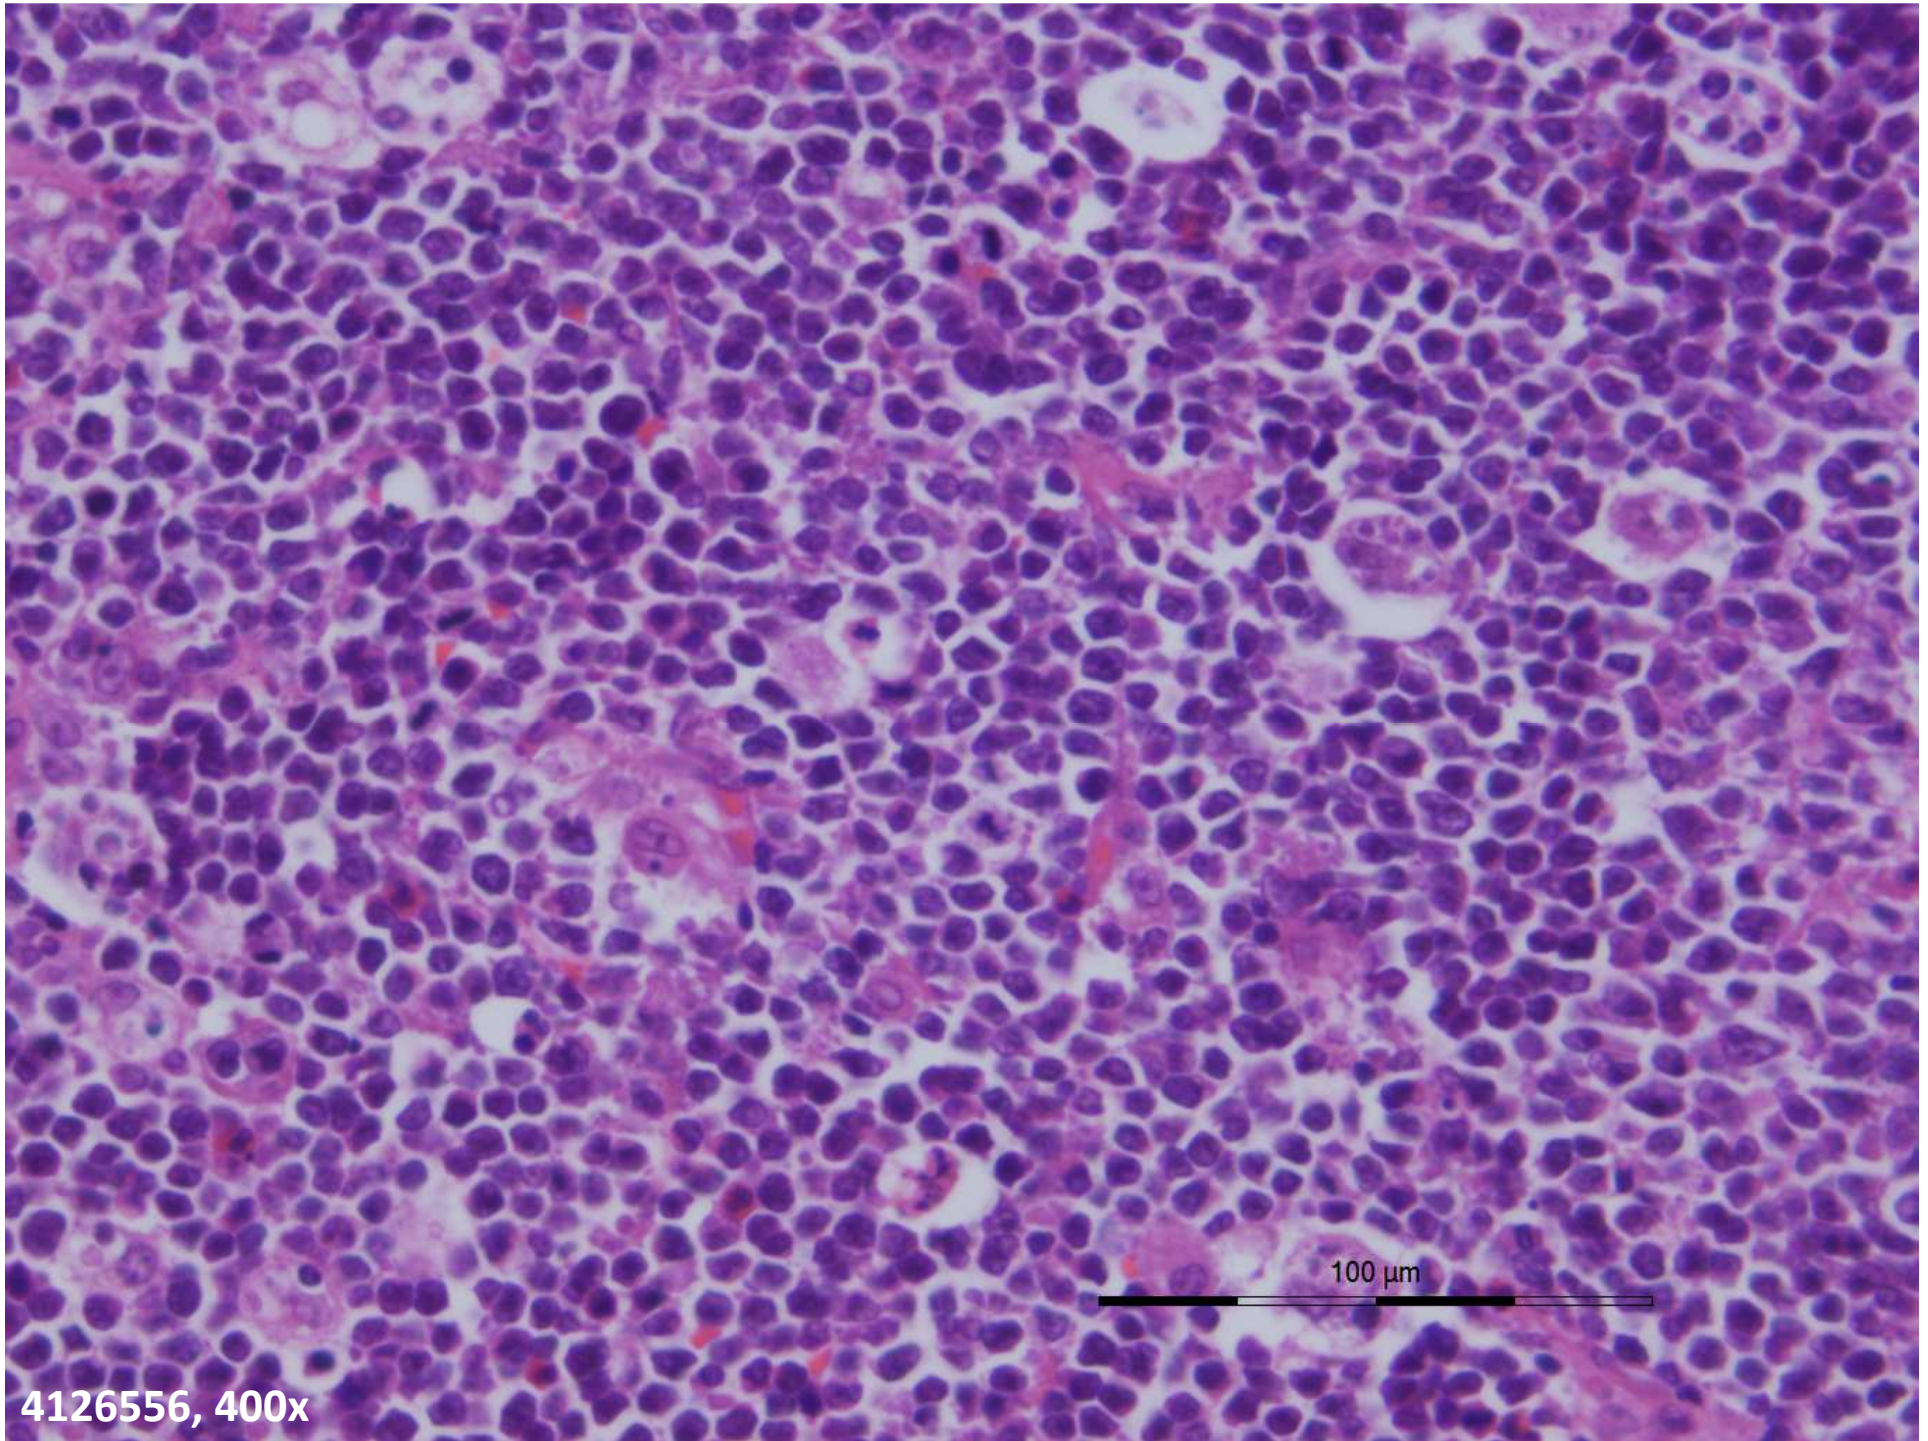

412656, 400x

100  $\mu$ m

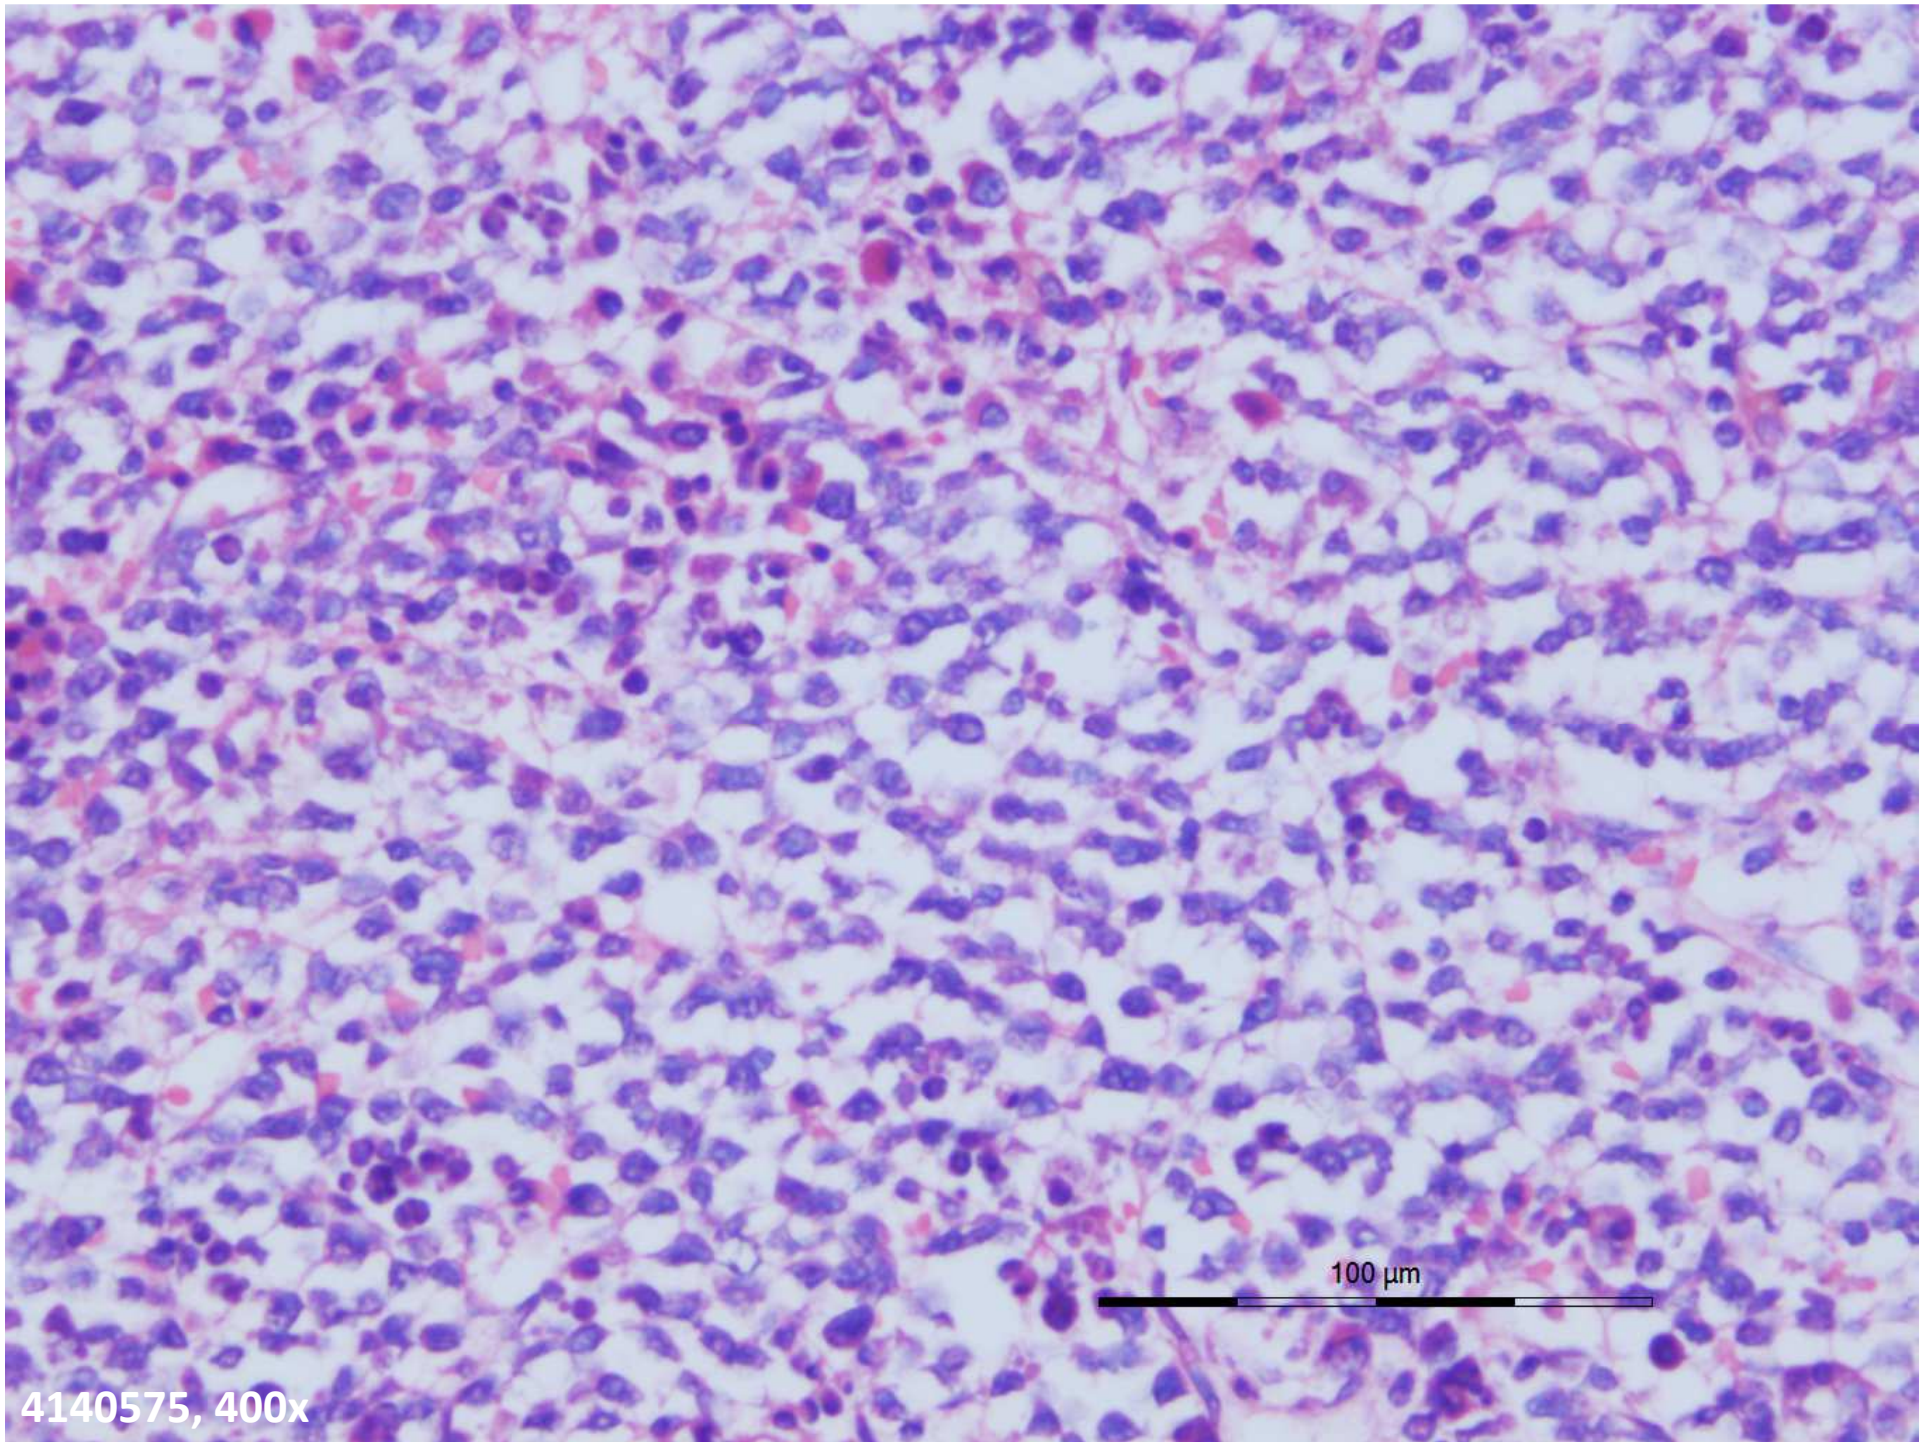

4140575, 400x

100  $\mu$ m

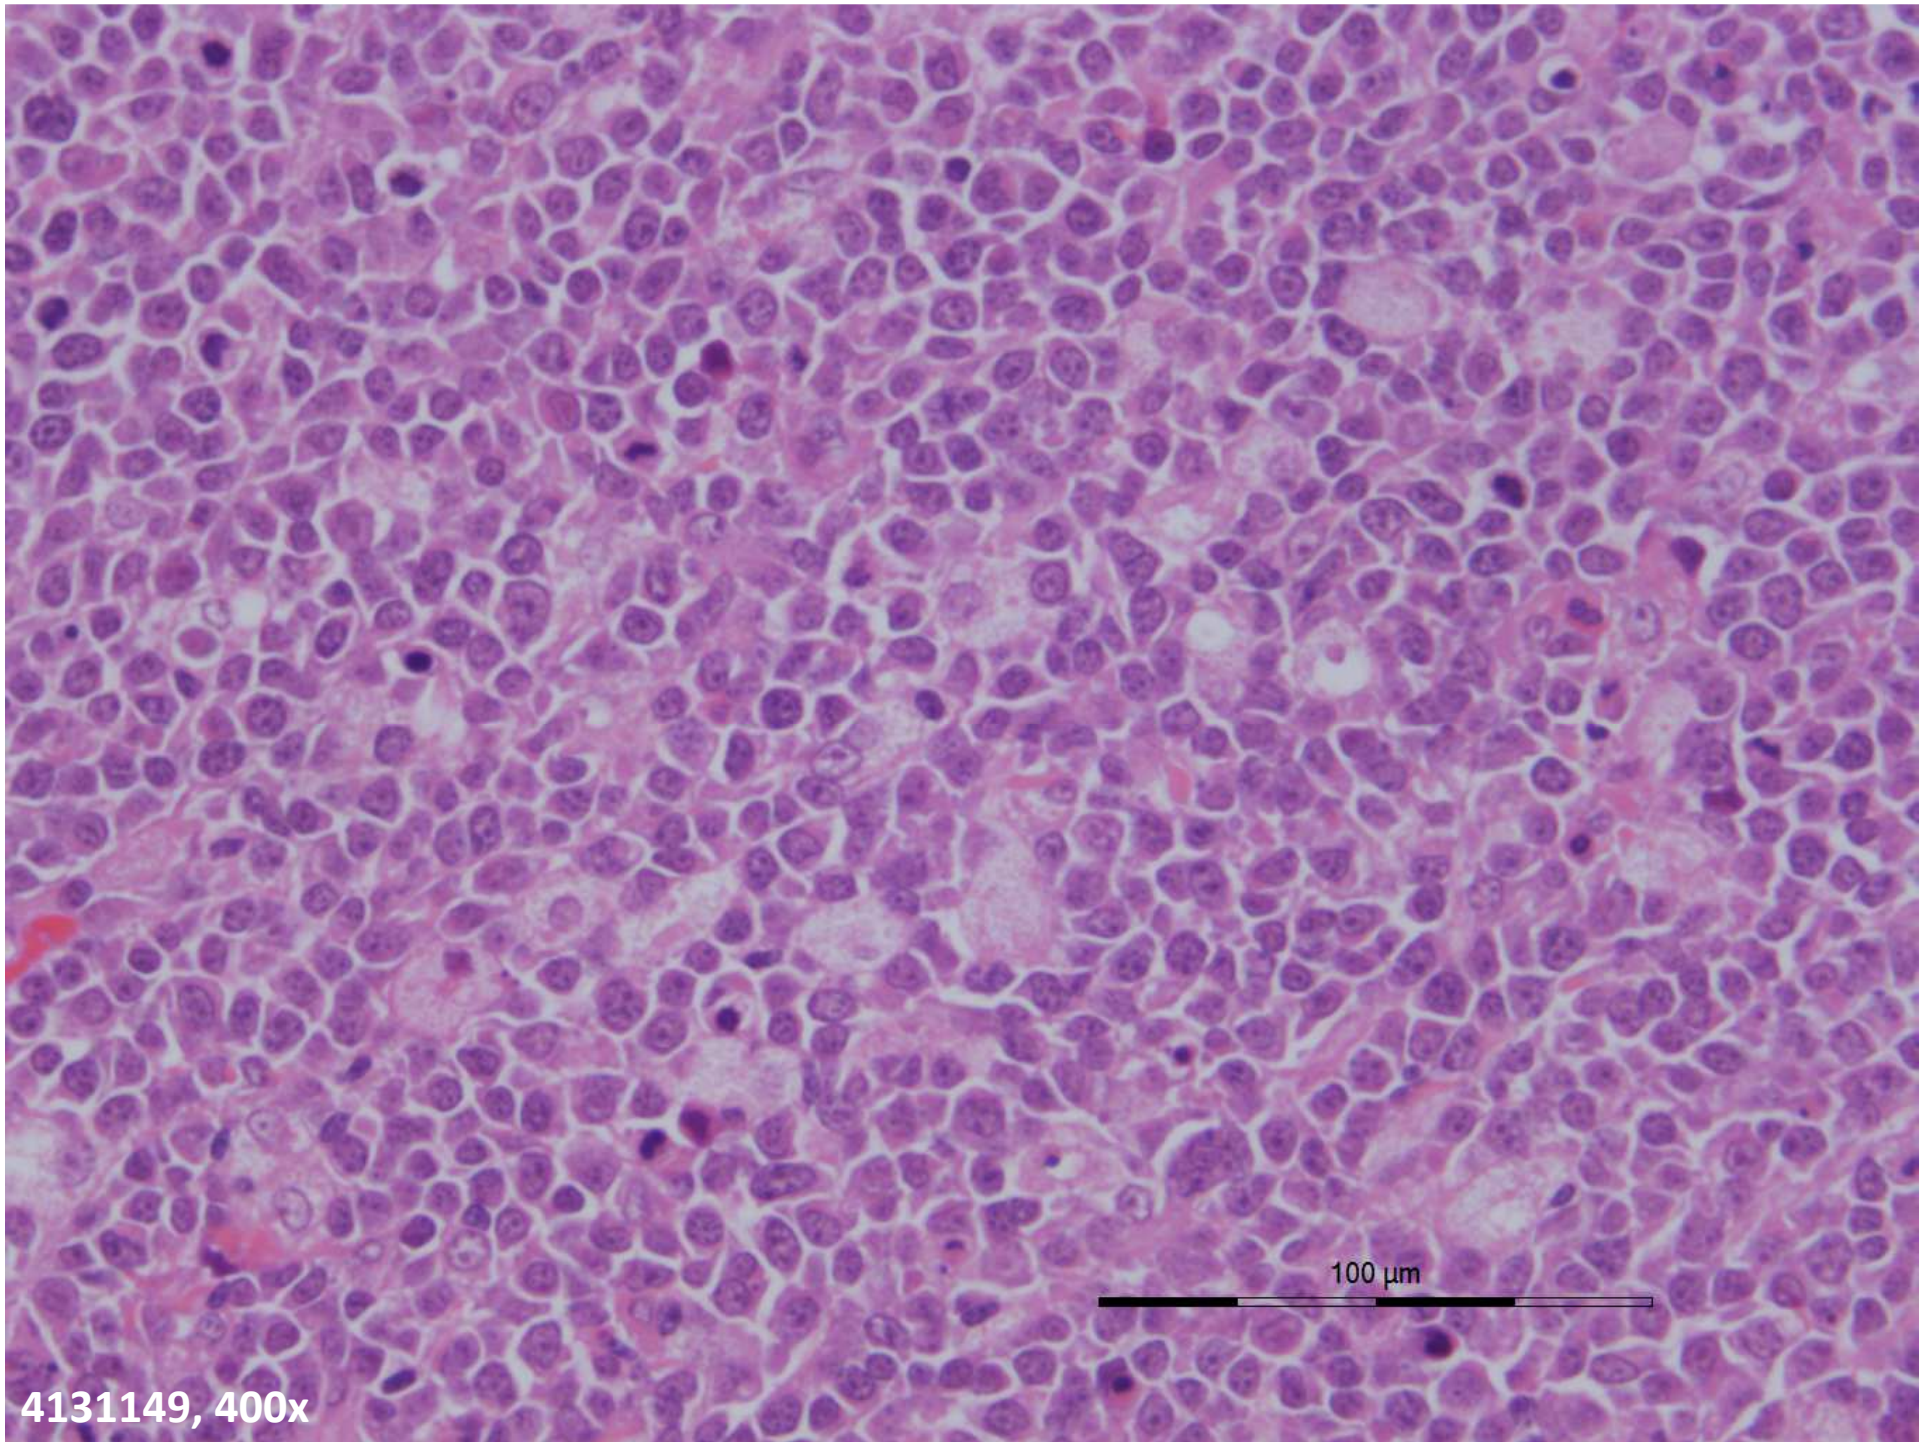

4131149, 400x

100  $\mu$ m

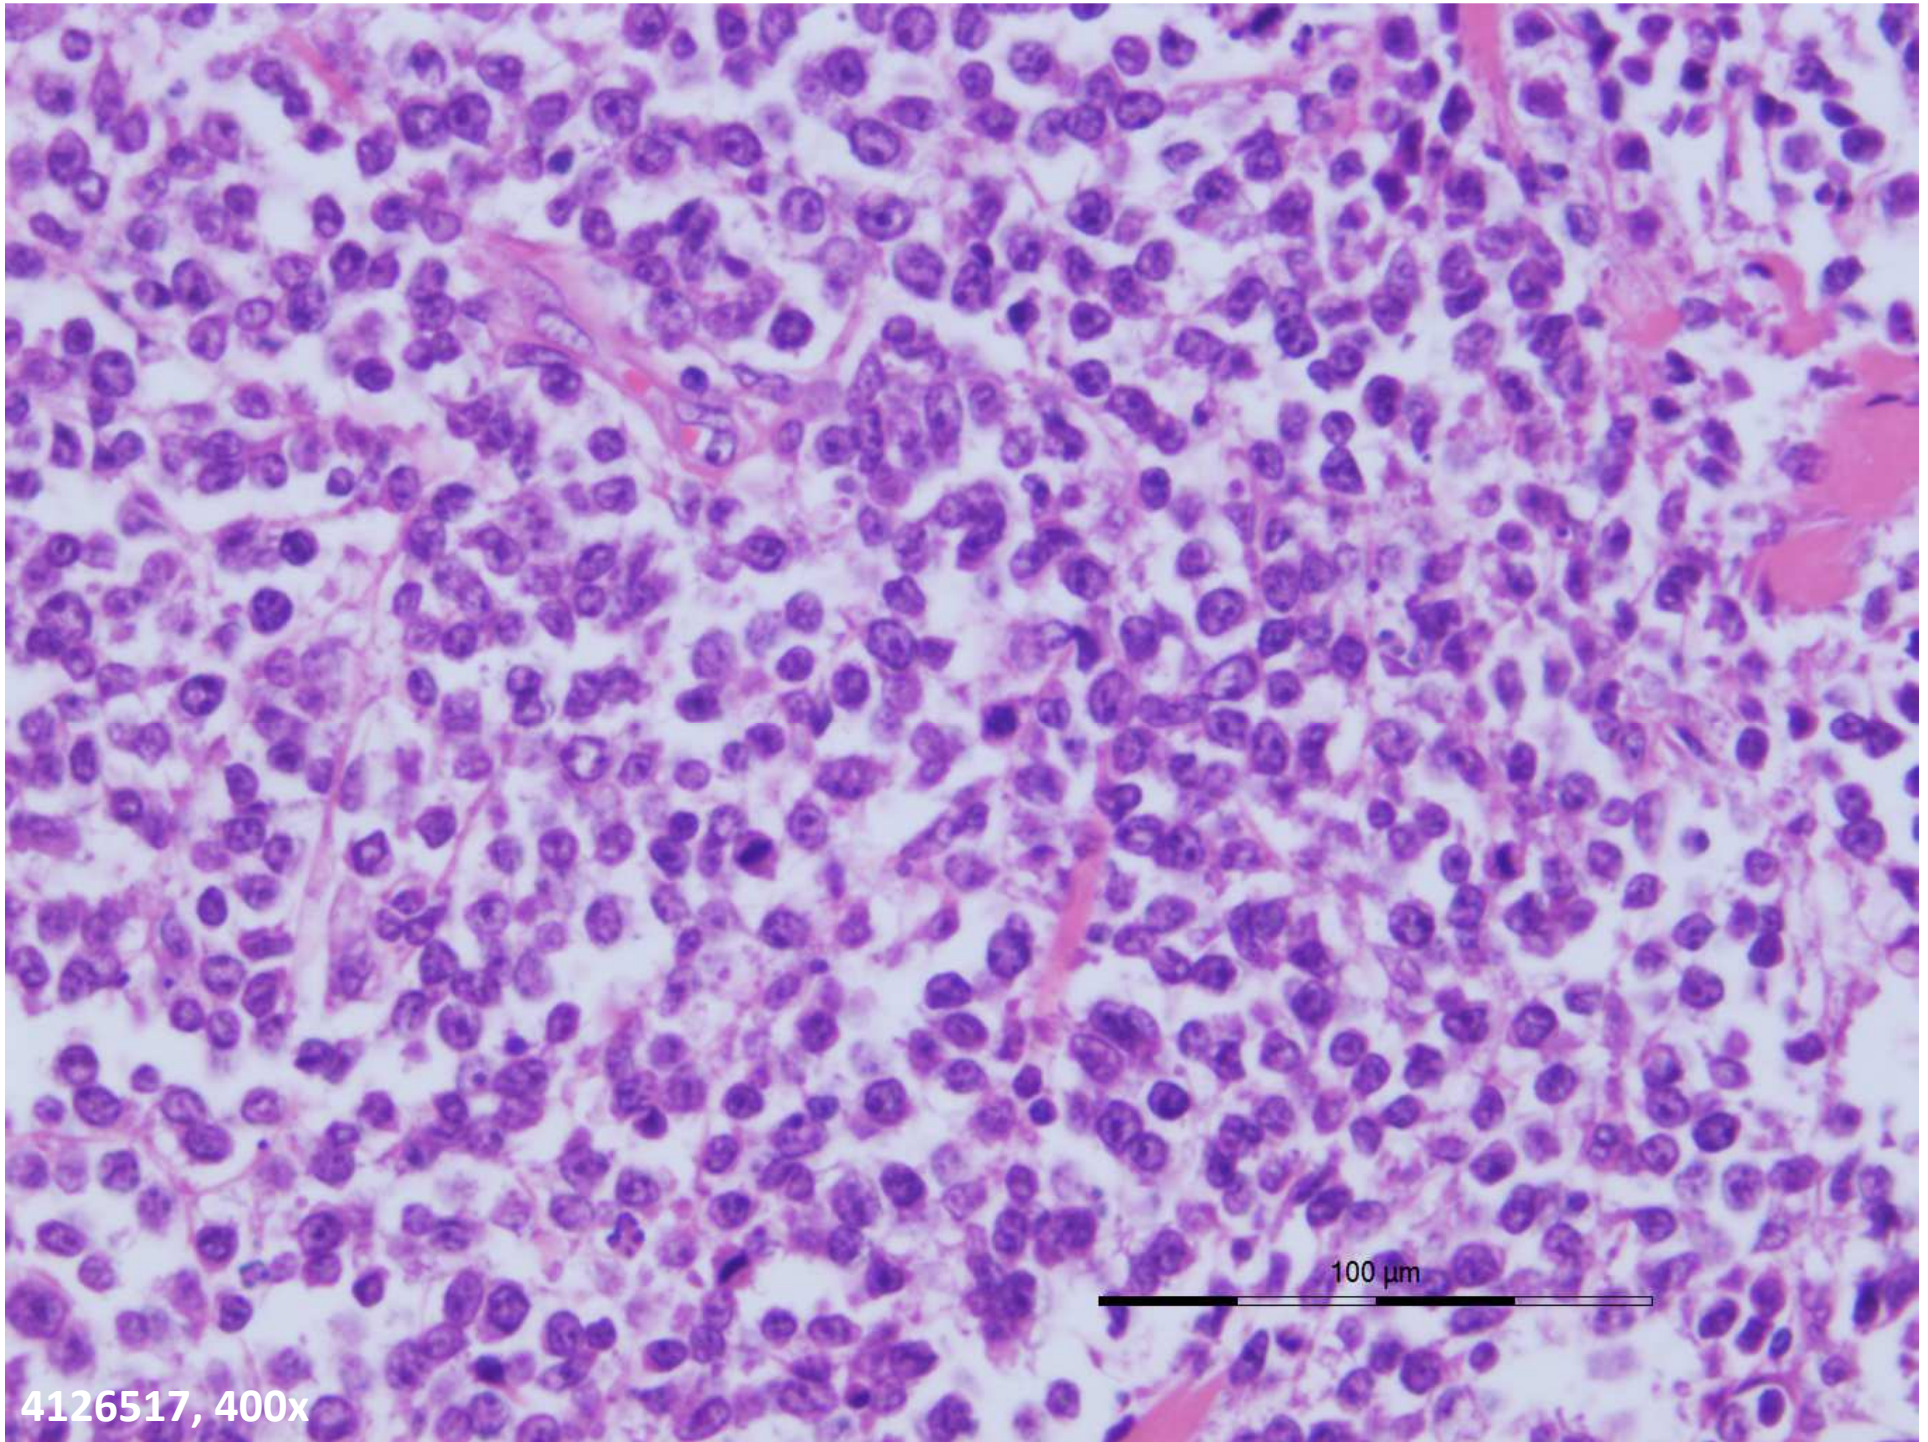

4126517, 400x

100  $\mu$ m

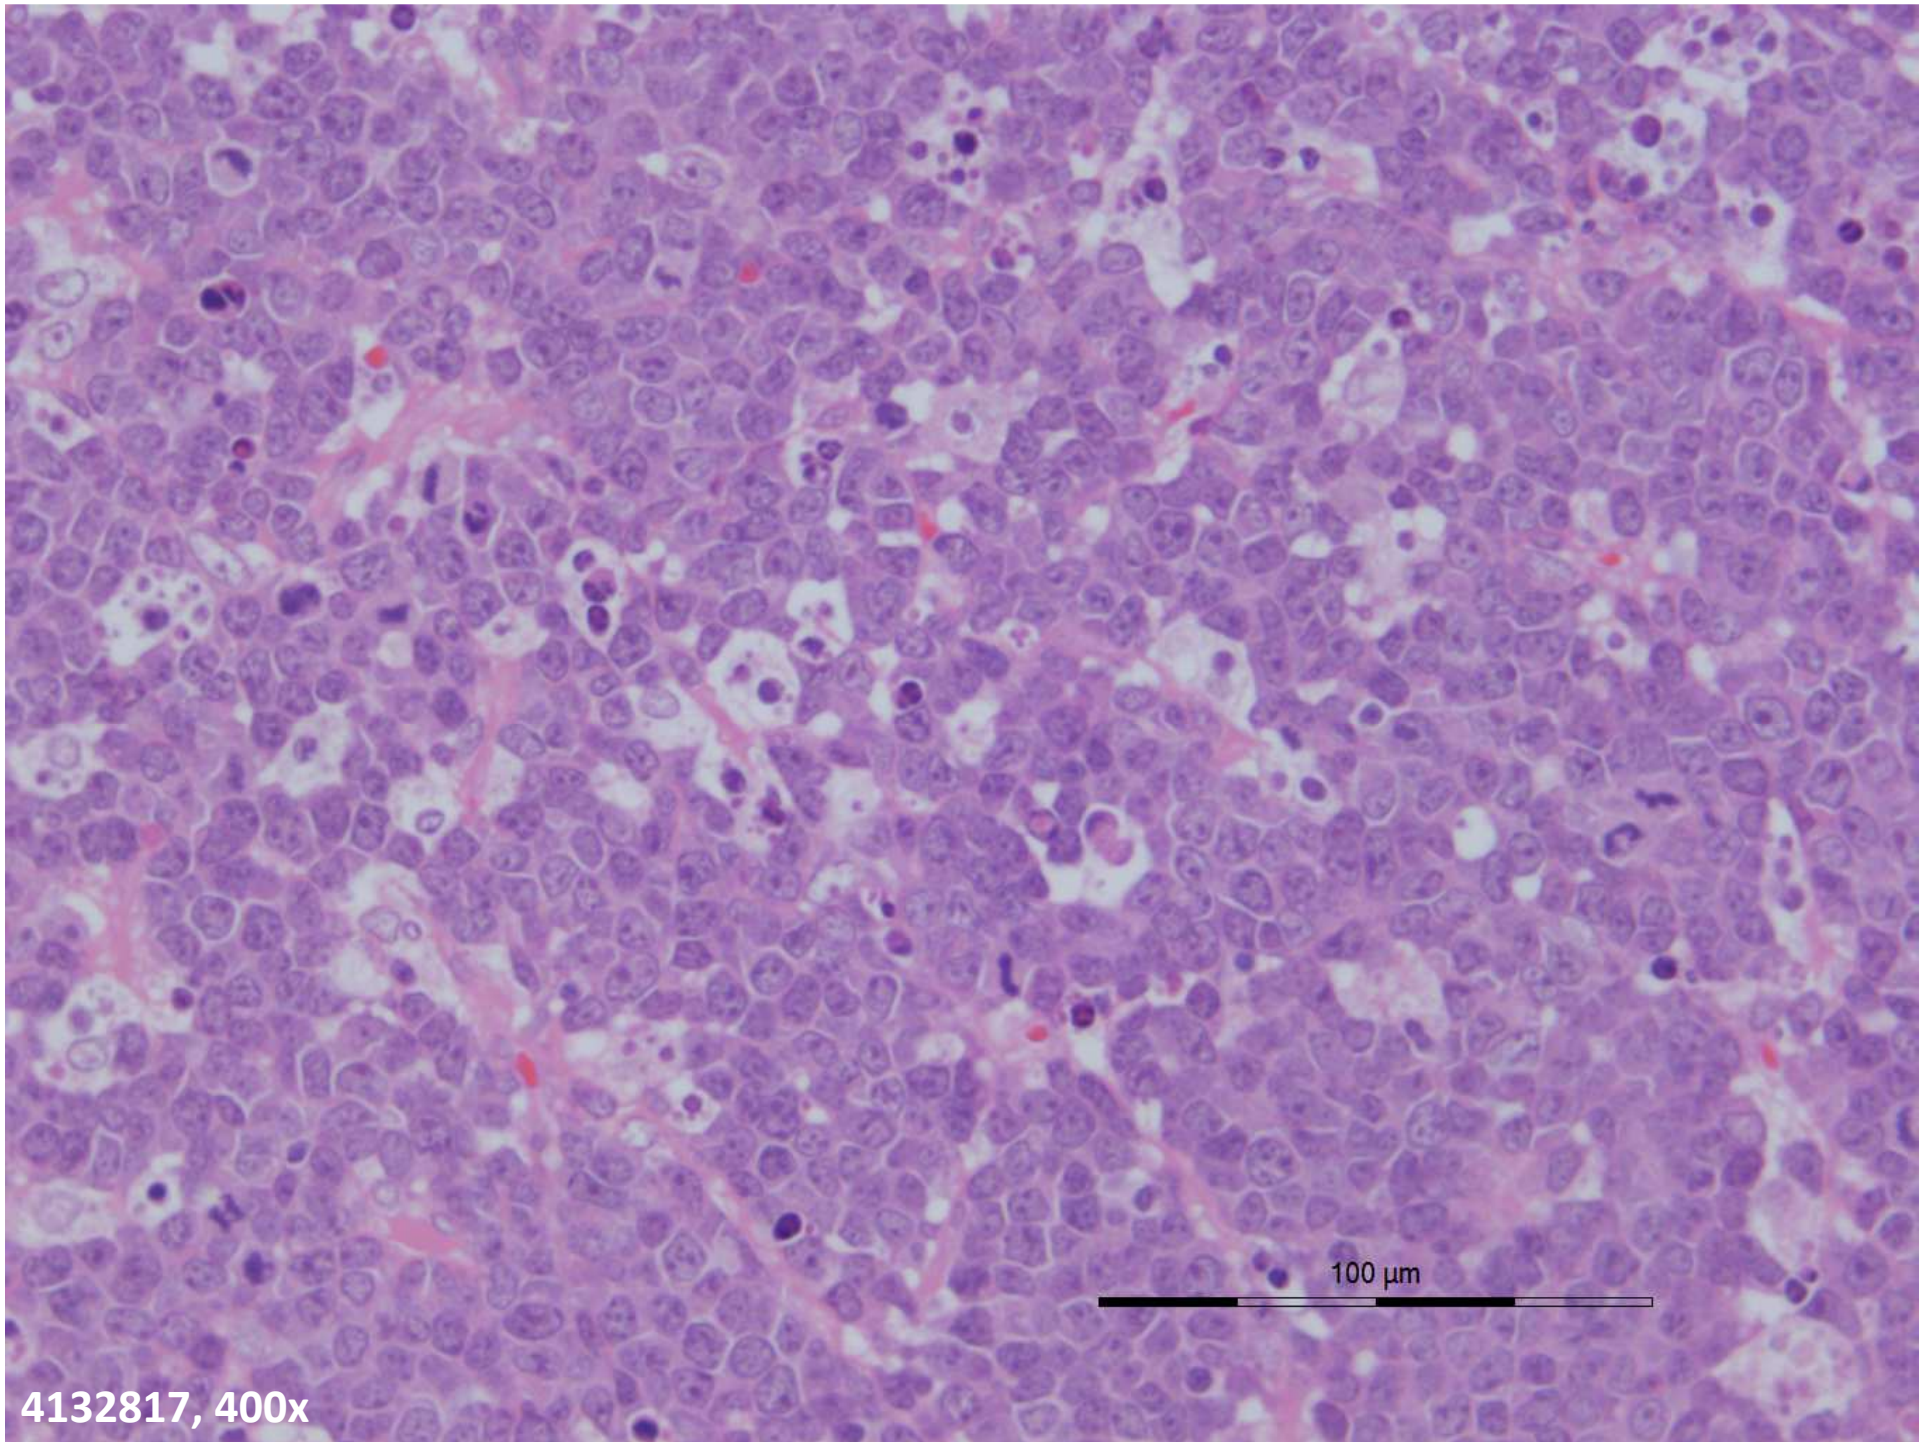

4132817, 400x

100  $\mu$ m

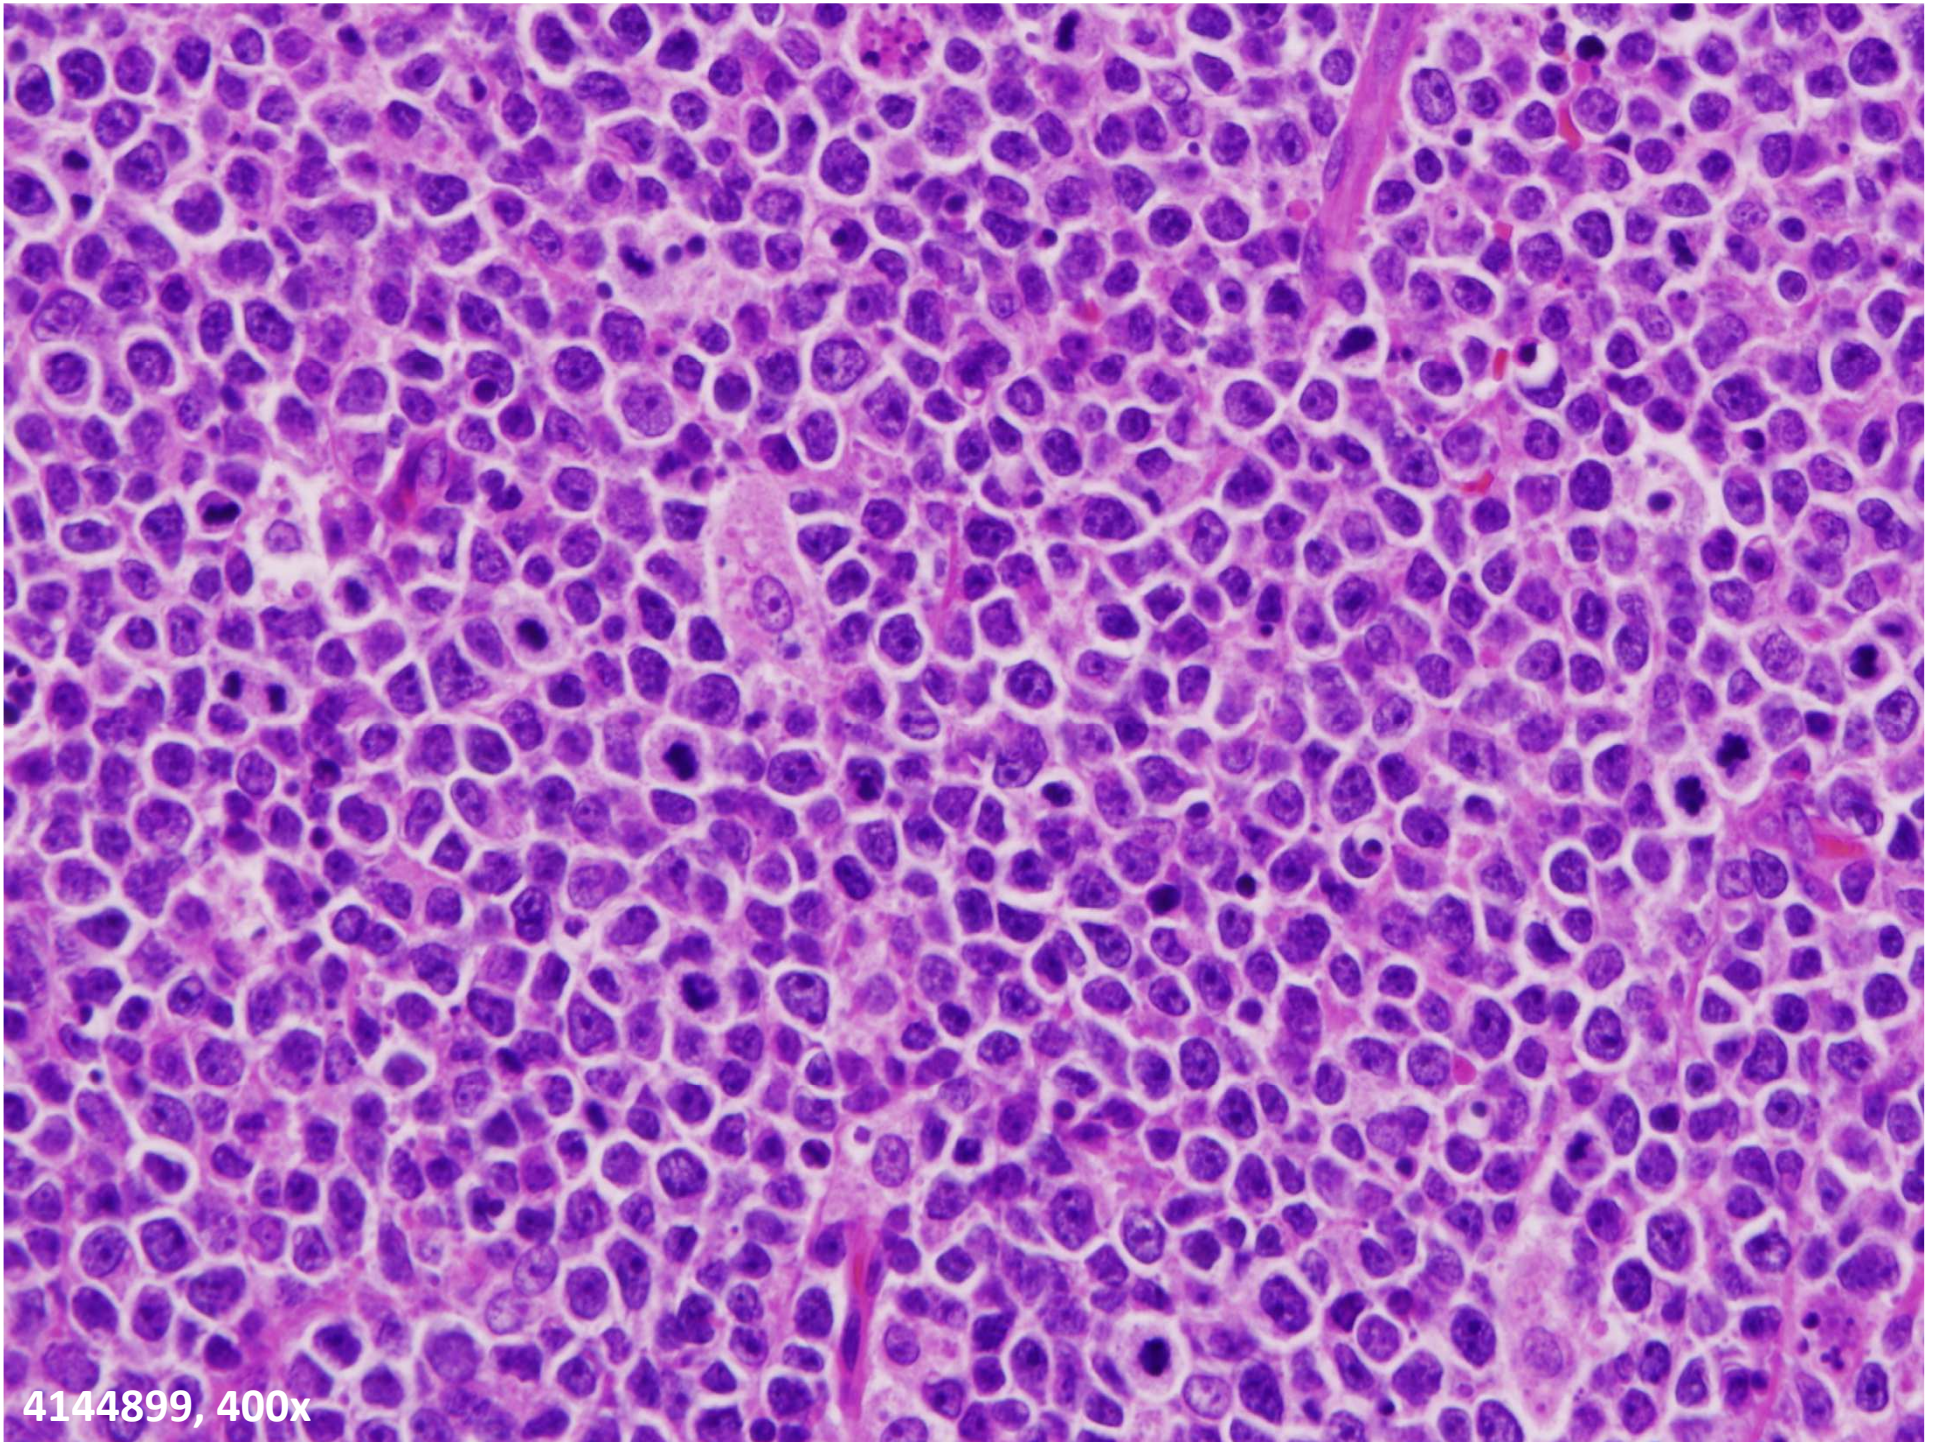

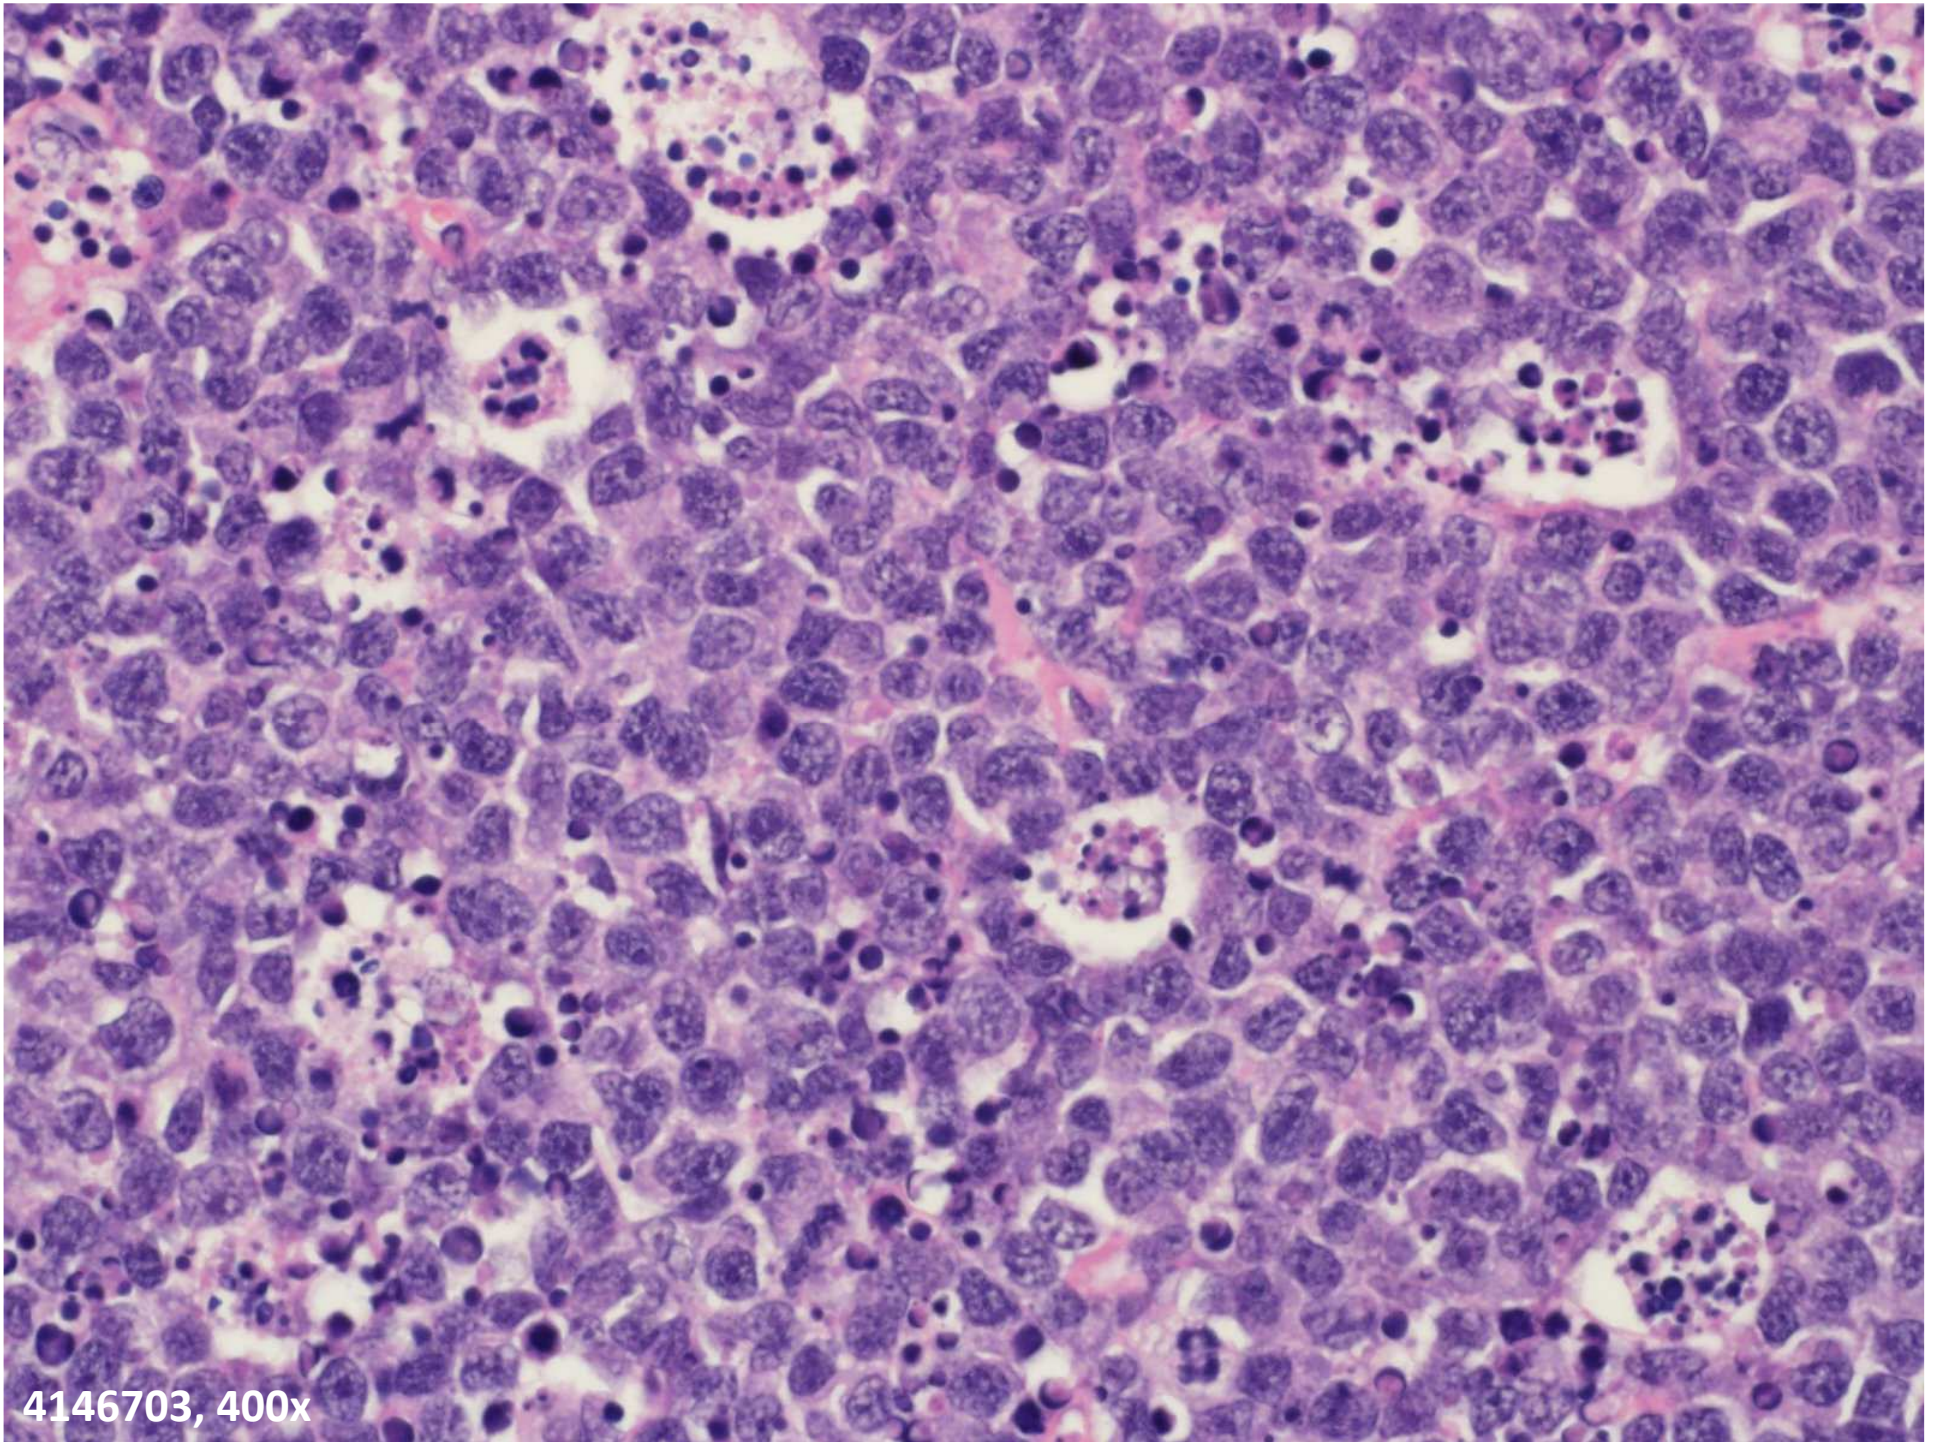

4146703, 400x

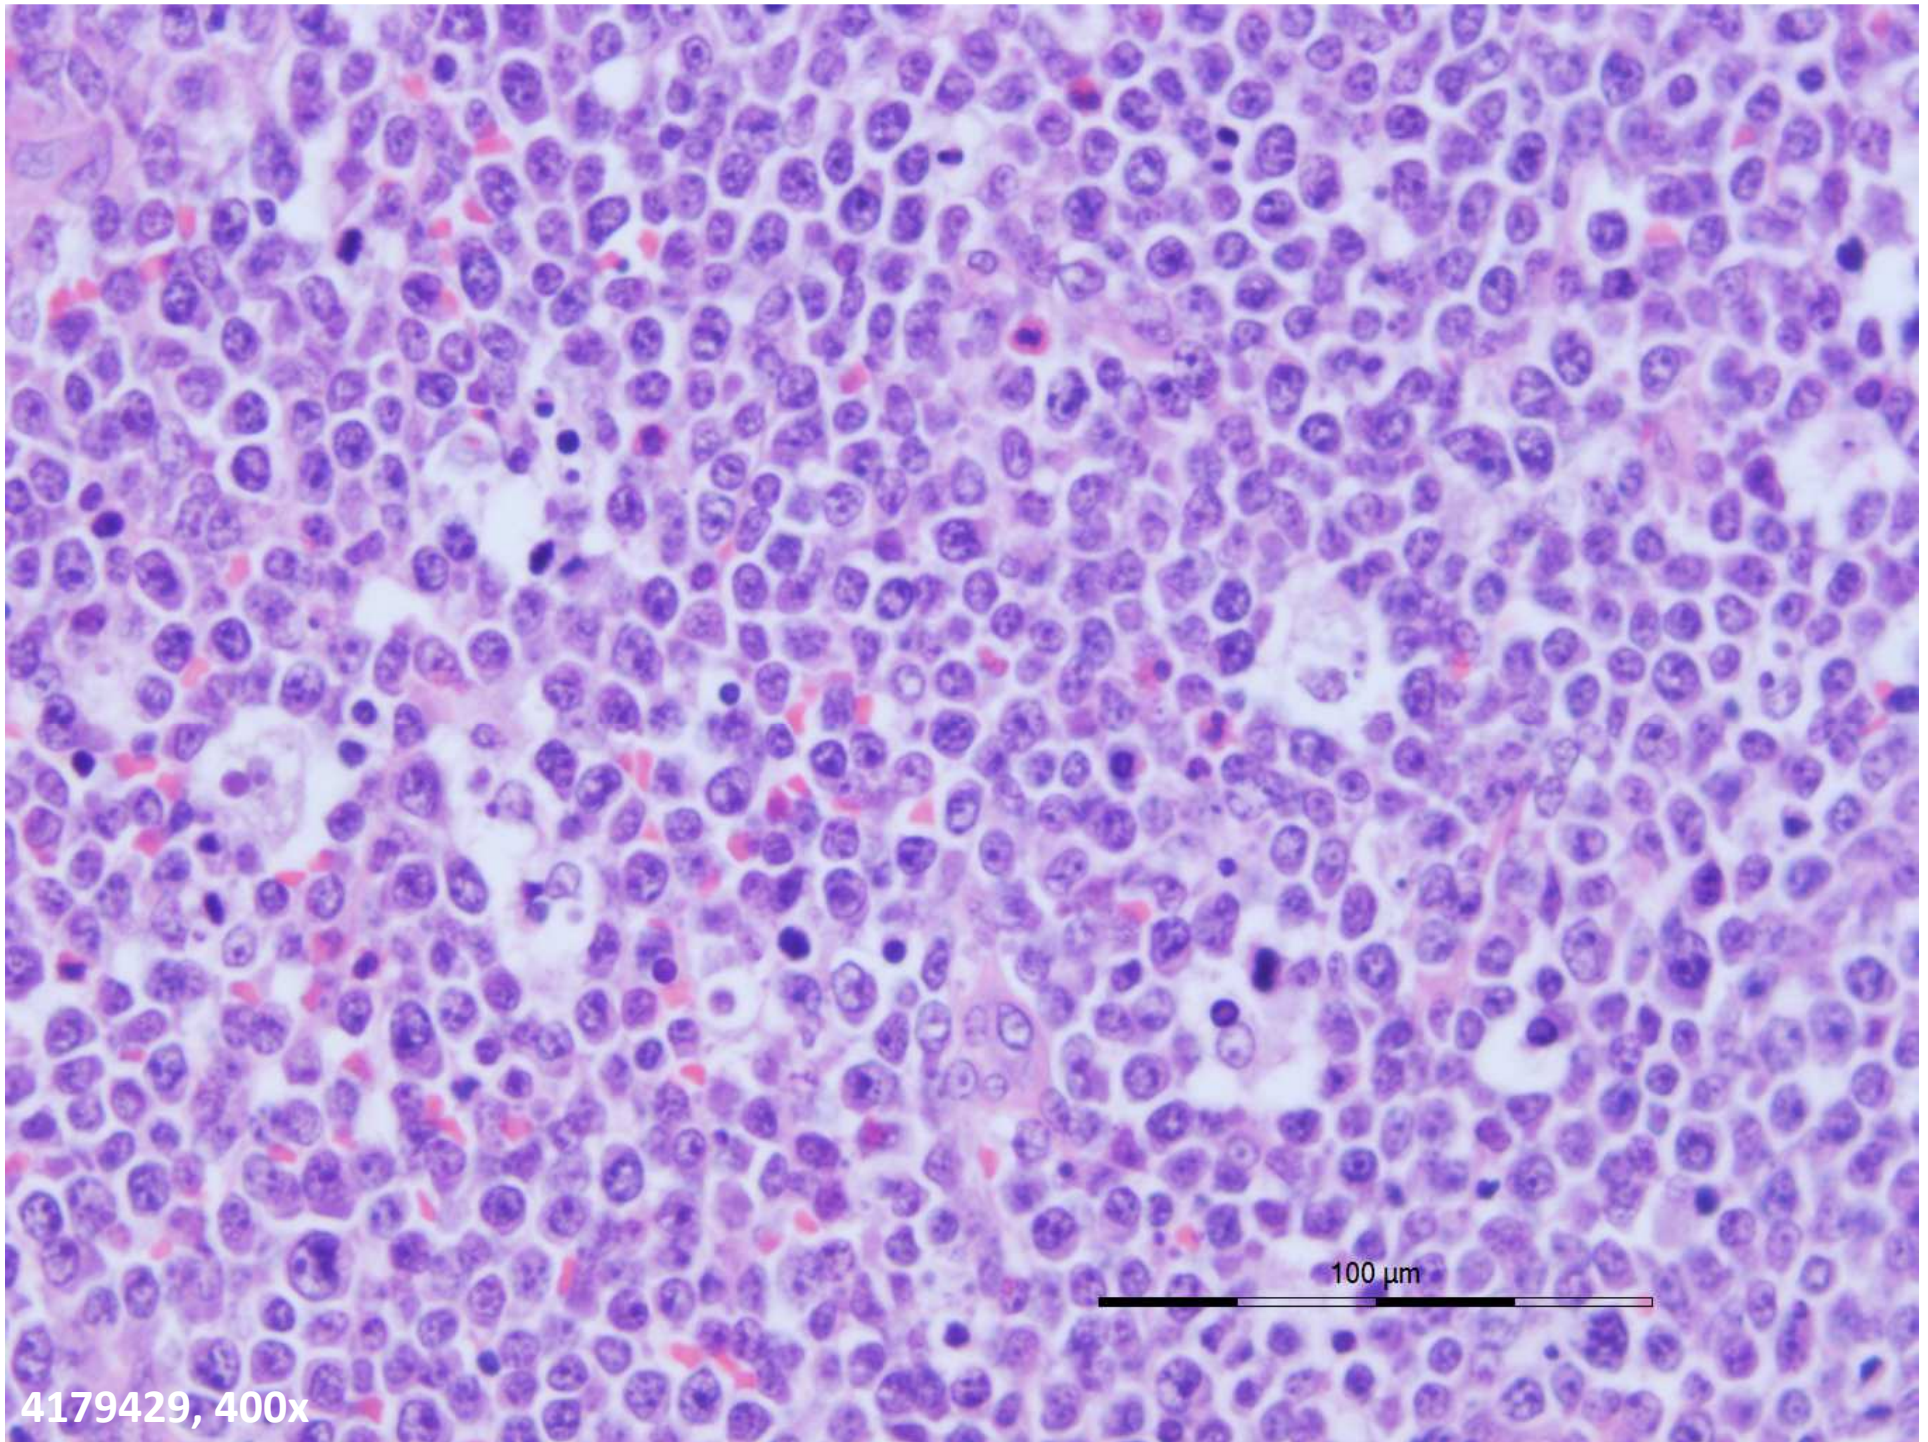

4179429, 400x



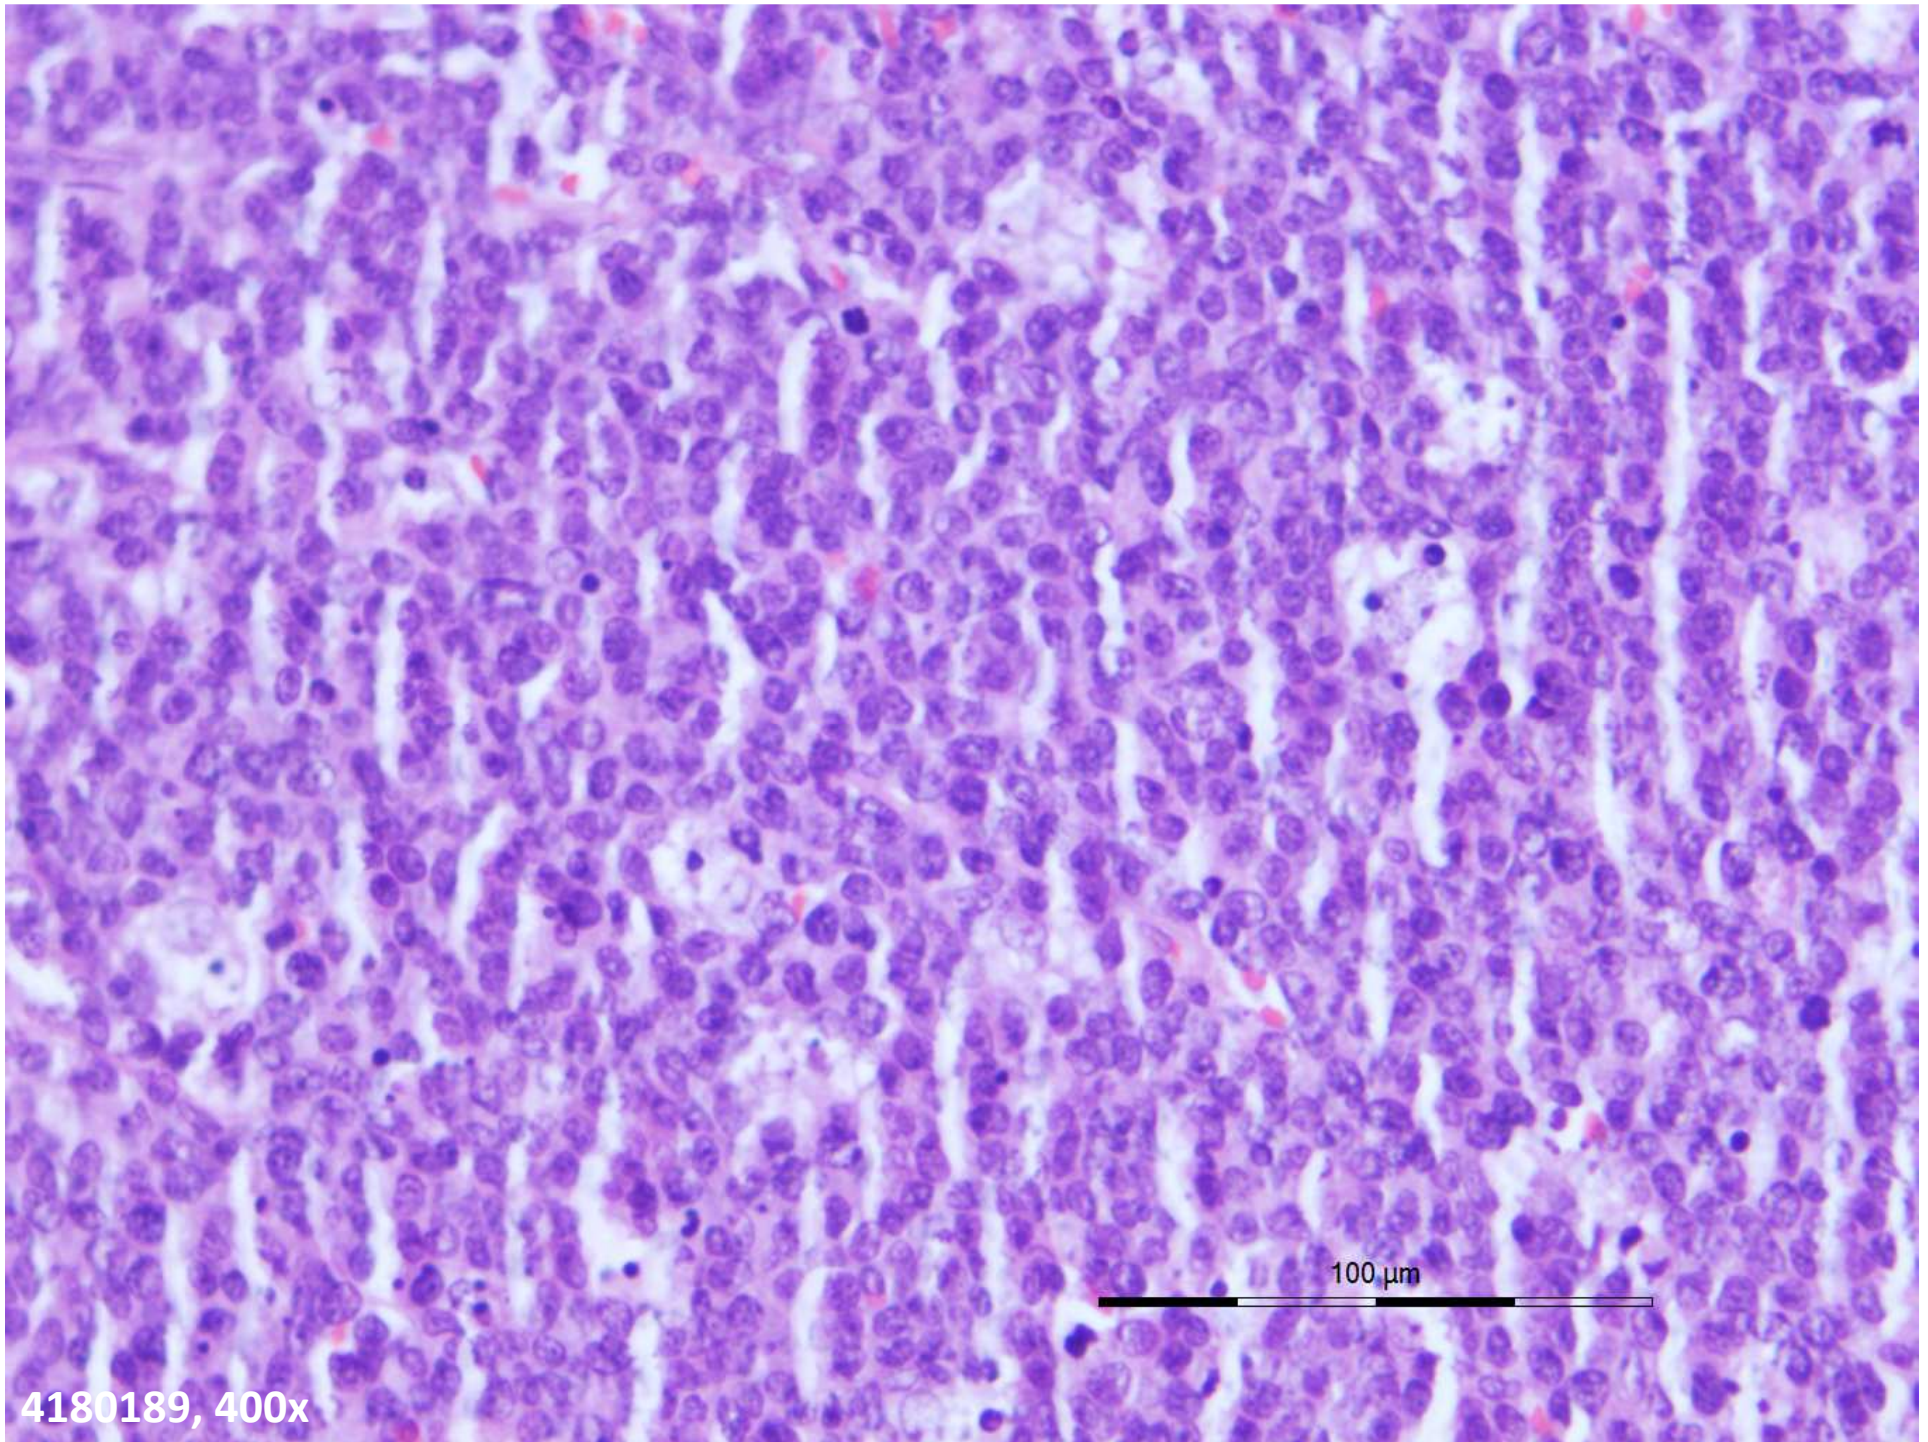

4180189, 400x

100 μm

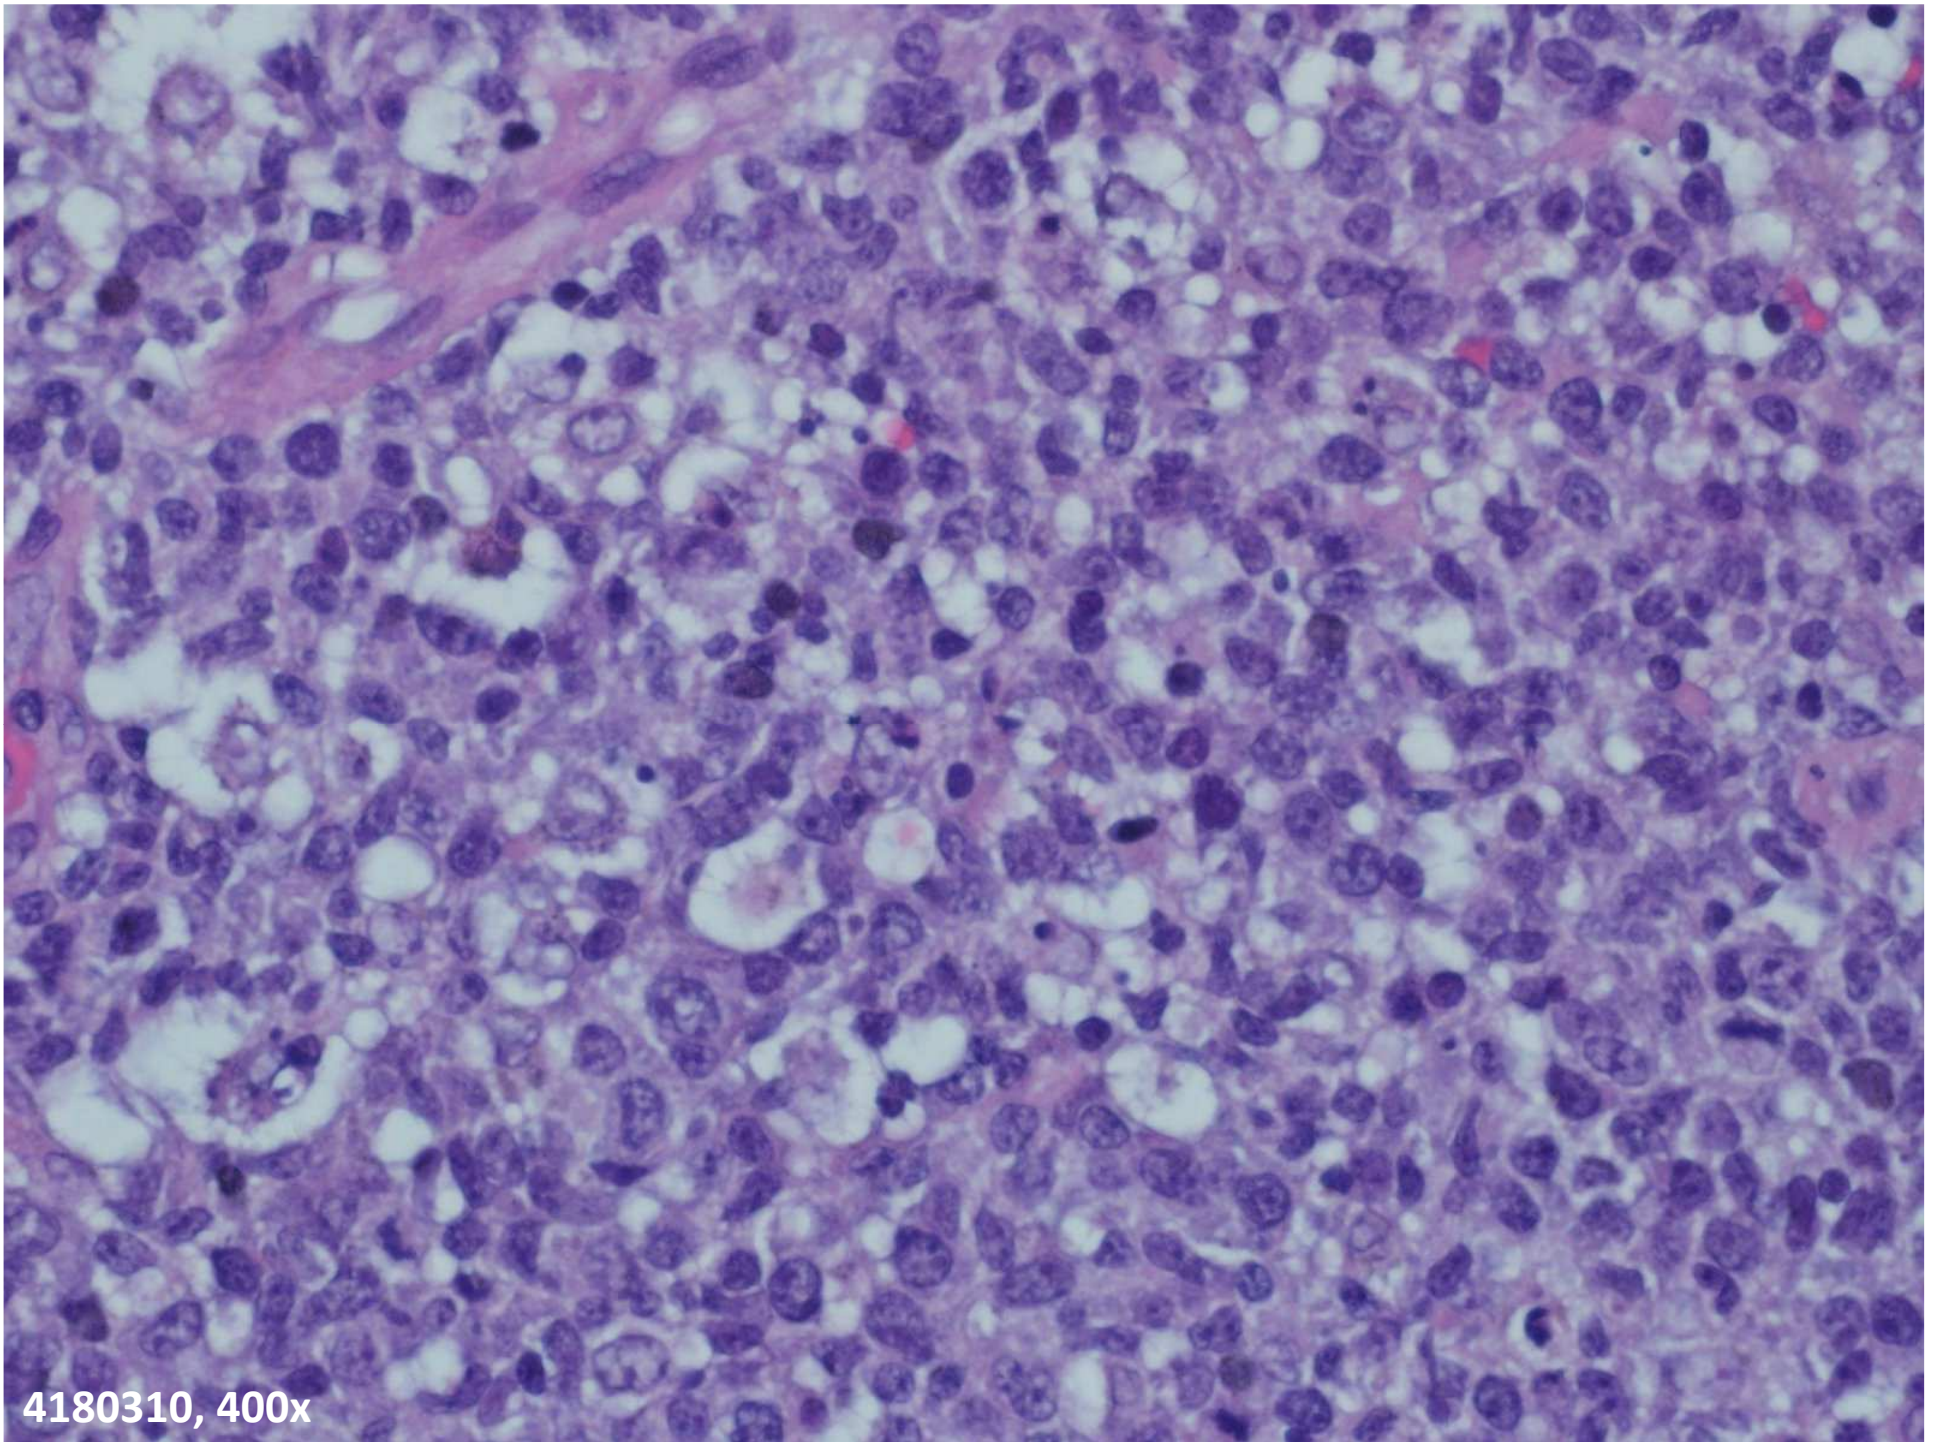

4180310, 400x

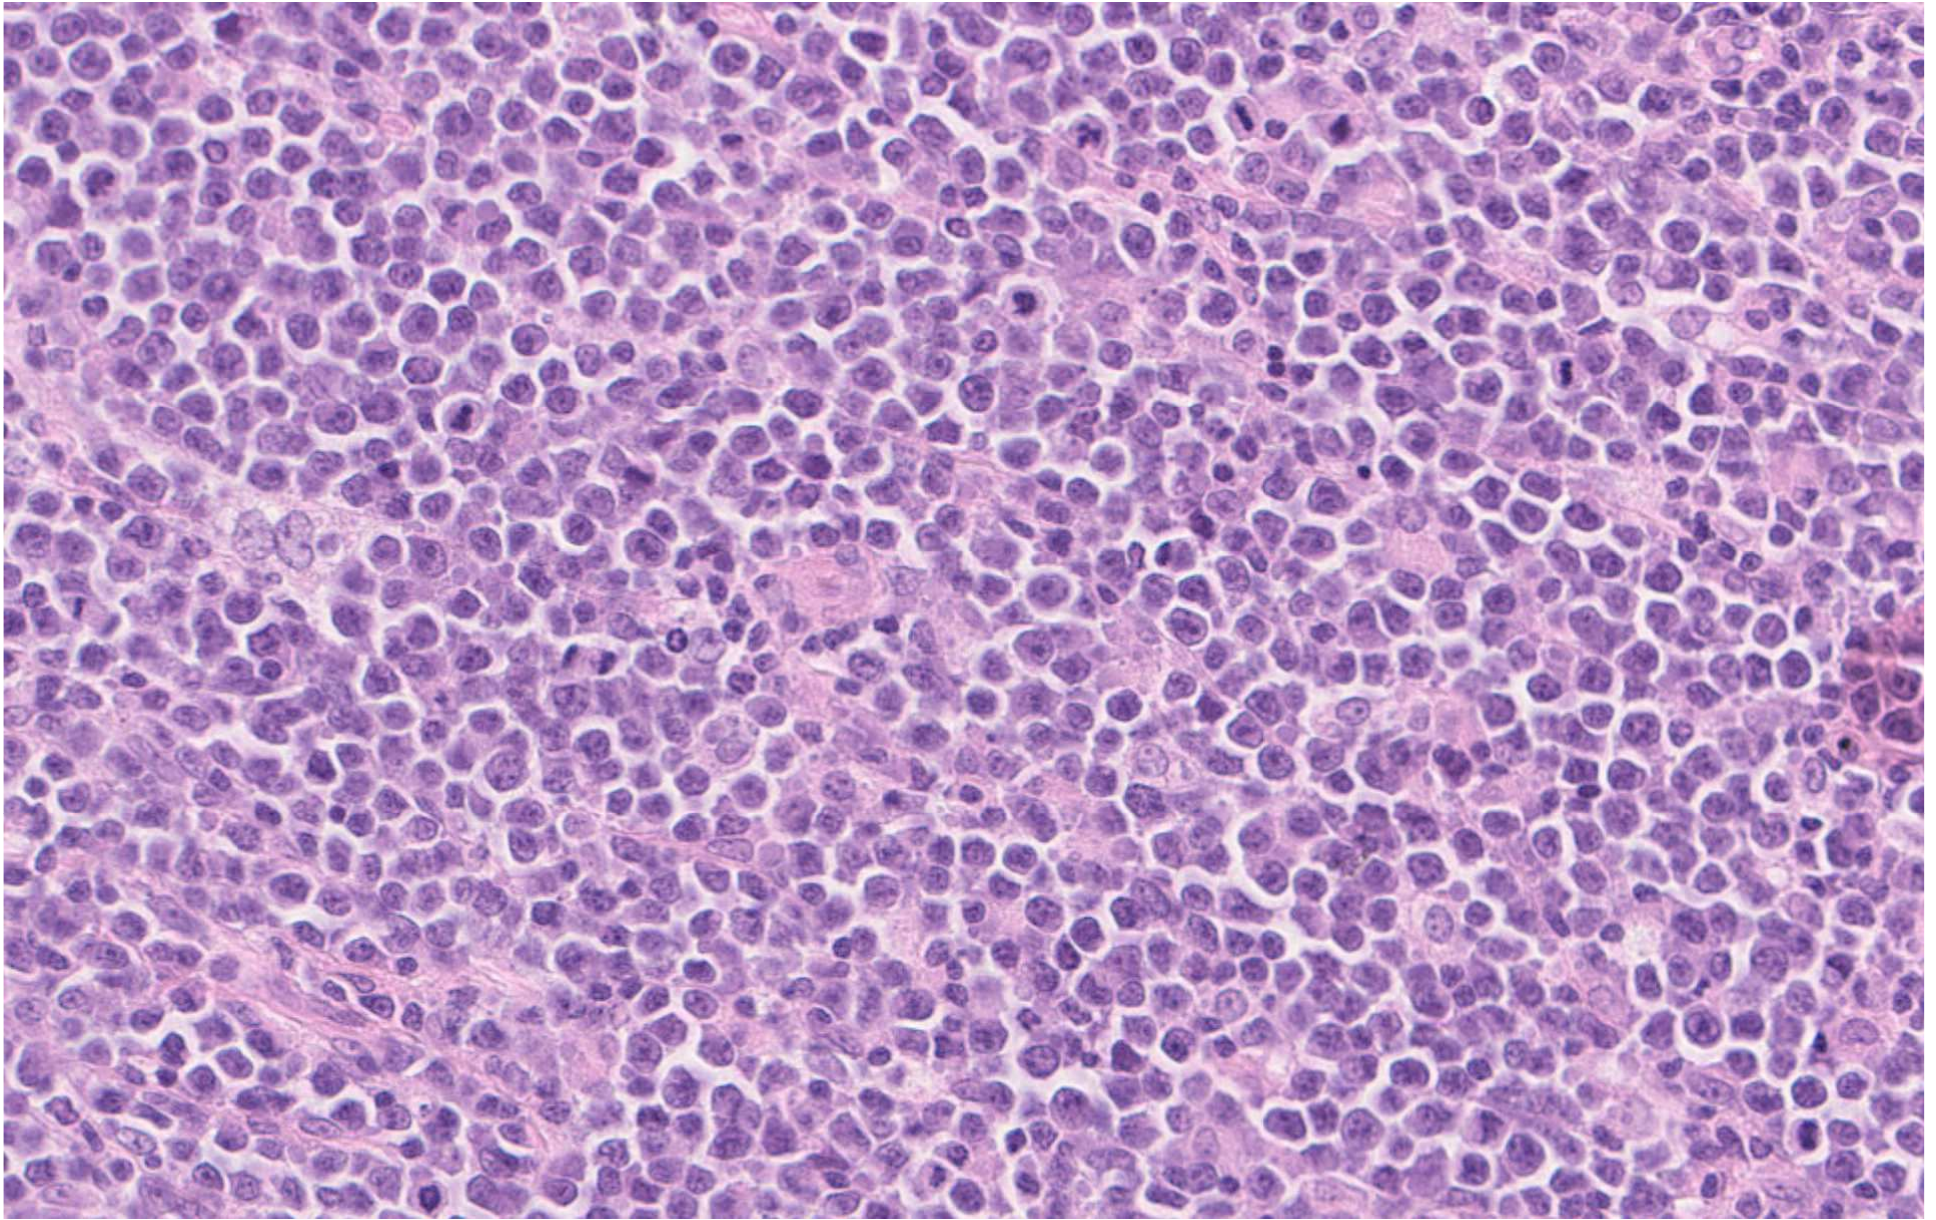

4181370, 400x
